# Supplementary material for: Carbonylative coupling of simple alkanes and alkenes enabled by organic photoredox catalysis
Source: Royal Society of Chemistry journal article supplement (doi:10.1039/d1cc04138j), 2021-01-01

## SUPPROTING INFORMATION

### **Carbonylative Coupling of Simple Alkanes and Alkenes Enabled by Organic Photoredox Catalysis**

Ling Chen, Jing Hou,\* Ming Zheng, Le-Wu Zhan, Wan-Ying Tang,\* Bin-dong Li\*  
College of Chemical Engineering, Nanjing University of Science and Technology, Nanjing  
210094, China.

E-mail: libindong@njjust.edu.cn; chmhouj@njjust.edu.cn

### **Contents**

|                                                   |     |
|---------------------------------------------------|-----|
| 1. General Information .....                      | S2  |
| 2. General Procedures .....                       | S2  |
| 3. Complementary Reaction Optimization Data ..... | S3  |
| 4. Mechanistic Studies .....                      | S5  |
| 5. Analytical Data of the Products .....          | S6  |
| 6. Reference .....                                | S15 |
| 7. NMR Spectra of Products .....                  | S16 |

## 1. General Information

Chemicals and solvents were purchased from commercial suppliers and used as received.  $^1\text{H}$  NMR,  $^{13}\text{C}$  NMR spectra were recorded on a Bruker AVANCEIII-500 (500 MHz) spectrometer. Chemical shifts were calibrated using residual undeuterated solvent as an internal reference ( $\text{CDCl}_3$ : 7.26 ppm  $^1\text{H}$  NMR, 77.16 ppm  $^{13}\text{C}$  NMR). Multiplicity was indicated as follows: s (singlet), d (doublet), t (triplet), q (quartet), m (multiplet), dd (doublet of doublet), brs (broad singlet). All high resolution mass spectra (HRMS) were obtained on a AB Sciex TripieTOF 4600 spectrometer. Column chromatography was carried out over 200-300 mesh silica gel. Blue LED (40 W,  $\lambda_{\text{max}} = 440$  nm) purchased from Kessil was used for blue light irradiation. Alkenes (**1b**<sup>1</sup>, **1c**<sup>2</sup>, **1d**<sup>2</sup>, **1e**<sup>2</sup>, **1f**<sup>3</sup>, **1g**<sup>1</sup>, **1h**<sup>1</sup>, **1i**<sup>4</sup>, **1j**<sup>5</sup>, **1k**<sup>6</sup>, **1l**<sup>2</sup>, **1m**<sup>1</sup>, **1n**<sup>3</sup>, **1o**<sup>4</sup>, **1p**<sup>1</sup>, **1q**<sup>7</sup>, **1r**<sup>8</sup>) and *N*-alkoxyazinium salts (**A**<sup>9</sup>, **B**<sup>10</sup>, **C**<sup>10</sup>, **D**<sup>10</sup>) were all prepared following reported literature protocols.

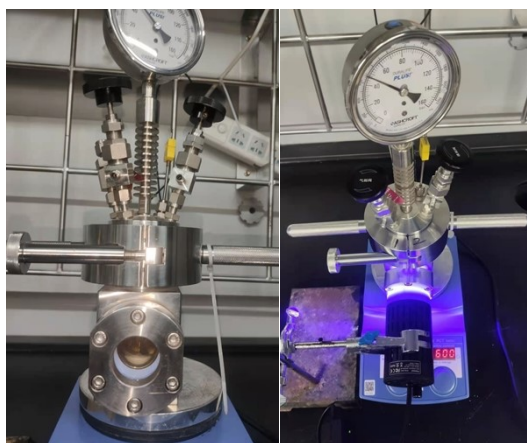

Figure S1. Devices for the photocatalytic reactions

## 2. General procedures

General procedure for carbonylation of alkanes: a 5 mL vial equipped with a magnetic stir bar was added 4CzIPN (3.2 mg, 0.004 mmol, 2 mol%), 4-cyano-1-isopropoxy-pyridin-1-ium trifluoromethanesulfonate (93.6 mg, 0.3 mmol, 1.5 equiv). Subsequently, corresponding alkene (0.2 mmol, 1.0 equiv), cyclohexane (1.5 mL) and 1,2-dichloromethane (1.5 mL) was added through injection port. The vials were placed into an autoclave with one inserted quartz-glass windows. After the autoclave was flushed three times, it was filled with 20 atm of CO and then irradiated with blue LED (40 W,  $\lambda_{\text{max}} = 440$  nm) at rt for 12 h. Upon completion of the reaction, the pressure was carefully released and the solvent was removed under reduced pressure. The products were purified by flash chromatography (hexanes/EtOAc = 50/1).

### 3. Complementary Reaction Optimization Data

**Table S1** Photocat. evaluation<sup>a</sup>

Table S1 Photocatalytic reaction

Reaction scheme showing the photocatalytic reaction of 1a (1-phenylprop-1-ene) and 2a (cyclohexane) with CO (50 bar) to form 3a (1-(cyclohexylidene)-2-phenylprop-1-ene). The reaction conditions are: Photocat. (2 mol%), A (1.5 equiv), DCE (2.0 mL), Blue LED, rt, 12 h.

| entry | Photocat.                                                           | Yield (%) <sup>b</sup> |
|-------|---------------------------------------------------------------------|------------------------|
| 1     | 4CzIPN                                                              | 55                     |
| 2     | EosinY                                                              | 13                     |
| 3     | Ru(bpy) <sub>3</sub> Cl <sub>2</sub>                                | 16                     |
| 4     | Ru(bpy) <sub>3</sub> [PF <sub>6</sub> ] <sub>2</sub>                | 16                     |
| 5     | Ir(ppy) <sub>2</sub> (dtbpy)PF <sub>6</sub>                         | 33                     |
| 6     | Ir(ppy) <sub>3</sub>                                                | 28                     |
| 7     | [Ir(dF(CF <sub>3</sub> )ppy) <sub>2</sub> ](dtbbpy)]PF <sub>6</sub> | 37                     |

<sup>a</sup>Standard conditions: **1a** (0.2 mmol), **A** (1.5 equiv), Photocat. (2 mol%), **2a** (1 mL), DCE (2 mL) and CO (50 bar) at rt under LED irradiation, 12 h. <sup>b</sup>Isolated yields.

**Table S2** Screening of solvent<sup>a</sup>

Reaction scheme for the synthesis of **3a** from **1a** and **2a**:

**1a** + **2a** + CO (50 bar)  $\xrightarrow[\text{Blue LED, rt, 12 h}]{\text{4CzIPN (2 mol\%), A (1.5 equiv), Solvent (2.0 mL)}}$  **3a**

Chemical structures: **1a** (1-phenylprop-1-ene), **2a** (cyclohexane), **3a** (1-(cyclohexylidene)-2-phenylprop-1-ene).

| entry | Solvent           | Yield (%) <sup>b</sup> |
|-------|-------------------|------------------------|
| 1     | EA                | 24                     |
| 2     | MeCN              | 10                     |
| 3     | Acetone           | 30                     |
| 4     | DCE               | 55                     |
| 5     | DMSO              | 3                      |
| 6     | DCM               | 50                     |
| 7     | CHCl <sub>3</sub> | 14                     |

<sup>a</sup>Standard conditions: **1a** (0.2 mmol), **A** (1.5 equiv), 4CzIPN (2 mol%), **2a** (1 mL), Solvent (2 mL) and CO (50 bar) at rt under LED irradiation, 12 h. <sup>b</sup>Isolated yields.

**Table S3** Screening of the solvent ratio<sup>a</sup>

| entry | <b>2a</b> (n mL) | DCE (m mL) | Yield (%) <sup>b</sup> |
|-------|------------------|------------|------------------------|
| 1     | 1                | 3          | 38                     |
| 2     | 0.5              | 2.5        | 21                     |
| 3     | 1                | 2          | 55                     |
| 4     | 1.5              | 1.5        | 71                     |
| 5     | 2                | 1          | 54                     |

<sup>a</sup>Standard conditions: **1a** (0.2 mmol), **A** (1.5 equiv), 4CzIPN (2 mol%), **2a** (n mL), DCE (m mL) and CO (50 bar) at rt under LED irradiation, 12 h. <sup>b</sup>Isolated yields.

**Table S4** Screening of the oxidant<sup>a</sup>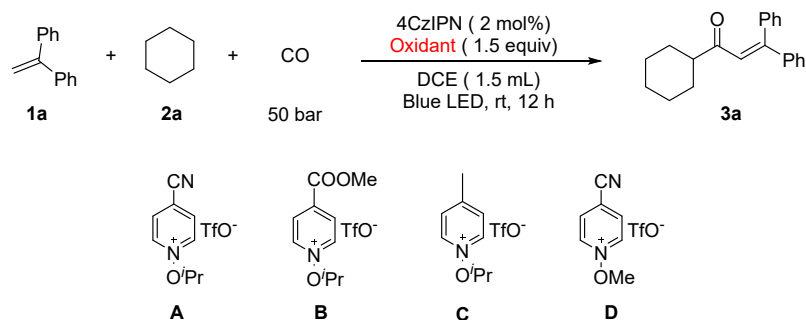

| entry | Oxidant                                                       | Yield (%) <sup>b</sup> |
|-------|---------------------------------------------------------------|------------------------|
| 1     | <b>A</b>                                                      | 71                     |
| 2     | <b>B</b>                                                      | 47                     |
| 3     | <b>C</b>                                                      | 32                     |
| 4     | <b>D</b>                                                      | 53                     |
| 5     | K <sub>2</sub> S <sub>2</sub> O <sub>8</sub>                  | NR                     |
| 6     | (NH <sub>4</sub> ) <sub>2</sub> S <sub>2</sub> O <sub>8</sub> | NR                     |

<sup>a</sup>Standard conditions: **1a** (0.2 mmol), Oxidant (1.5 equiv), 4CzIPN (2 mol%), **2a** (1.5 mL), DCE (1.5 mL) and CO (50 bar) at rt under LED irradiation, 12 h. <sup>b</sup>Isolated yields. NR= no reaction.

**Table S5** Screening of the temperature<sup>a</sup>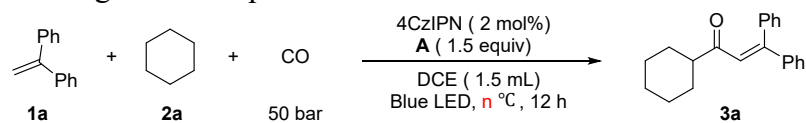

| entry | Temperature (°C) | Yield (%) <sup>b</sup> |
|-------|------------------|------------------------|
| 1     | rt               | 71                     |
| 2     | 50               | 67                     |
| 3     | 70               | 65                     |

<sup>a</sup>Standard conditions: **1a** (0.2 mmol), **A** (n equiv), 4CzIPN (2 mol%), **2a** (1.5 mL), DCE (1.5 mL) and CO (50 bar) at n °C under LED irradiation, 12 h. <sup>b</sup>Isolated yields.

**Table S6** Screening of the amount of **A**<sup>a</sup>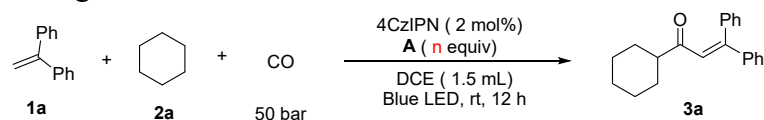

| entry | <b>A</b> (n equiv) | Yield (%) <sup>b</sup> |
|-------|--------------------|------------------------|
| 1     | 1.0                | 69                     |
| 2     | 1.5                | 71                     |
| 3     | 2.0                | 60                     |

<sup>a</sup>Standard conditions: **1a** (0.2 mmol), **A** (n equiv), 4CzIPN (2 mol%), **2a** (1.5 mL), DCE (1.5 mL) and CO (50 bar) at rt under LED irradiation, 12 h. <sup>b</sup>Isolated yields.

**Table S7** Screening of the concentration<sup>a</sup>

| <chem>c1ccccc1C=C(c2ccccc2)c3ccccc3</chem> ( <b>1a</b> ) + <chem>C1CCCCC1</chem> ( <b>2a</b> ) + CO |                  |                        | $\xrightarrow[\text{DCE (1.5 mL), Blue LED, rt, 12 h}]{\text{4CzIPN (2 mol\%), A (1.5 equiv)}}$ | <chem>c1ccccc1C(=O)C=C(c2ccccc2)c3ccccc3</chem> ( <b>3a</b> ) |
|-----------------------------------------------------------------------------------------------------|------------------|------------------------|-------------------------------------------------------------------------------------------------|---------------------------------------------------------------|
|                                                                                                     | 50 bar           |                        |                                                                                                 |                                                               |
| entry                                                                                               | <b>1a</b> (mmol) | Yield (%) <sup>b</sup> |                                                                                                 |                                                               |
| 1                                                                                                   | 0.1              | 69                     |                                                                                                 |                                                               |
| 2                                                                                                   | 0.2              | 71                     |                                                                                                 |                                                               |
| 3                                                                                                   | 0.3              | 60                     |                                                                                                 |                                                               |

<sup>a</sup>Standard conditions: **1a** (n mmol), **A** (1.5 equiv), 4CzIPN (2 mol%), **2a** (1.5 mL), DCE (1.5 mL) and CO (50 bar) at rt under LED irradiation, 12 h. <sup>b</sup>Isolated yields.

**Table S8** Screening of the CO pressure<sup>a</sup>

| <chem>c1ccccc1C=C(c2ccccc2)c3ccccc3</chem> ( <b>1a</b> ) + <chem>C1CCCCC1</chem> ( <b>2a</b> ) + CO |                   |                        | $\xrightarrow[\text{DCE (1.5 mL), Blue LED, rt, 12 h}]{\text{4CzIPN (2 mol\%), A (1.5 equiv)}}$ | <chem>c1ccccc1C(=O)C=C(c2ccccc2)c3ccccc3</chem> ( <b>3a</b> ) |
|-----------------------------------------------------------------------------------------------------|-------------------|------------------------|-------------------------------------------------------------------------------------------------|---------------------------------------------------------------|
|                                                                                                     | n bar             |                        |                                                                                                 |                                                               |
| entry                                                                                               | CO pressure (bar) | Yield (%) <sup>b</sup> |                                                                                                 |                                                               |
| 1                                                                                                   | 10                | 55                     |                                                                                                 |                                                               |
| 2                                                                                                   | 20                | 72                     |                                                                                                 |                                                               |
| 3                                                                                                   | 50                | 71                     |                                                                                                 |                                                               |

<sup>a</sup>Standard conditions: **1a** (0.2 mmol), **A** (1.5 equiv), 4CzIPN (2 mol%), **2a** (1.5 mL), DCE (1.5 mL) and CO (n bar) at rt under LED irradiation, 12 h. <sup>b</sup>Isolated yields.

## 4. Mechanistic Studies

In a typical experiment, a solution of 4CzIPN in anhydrous DCE (0.125 mM) was added with an appropriate amount of quencher in a quartz cuvette. Then the emission of the sample was collected. The emission intensity at 538 nm was collected with excited wavelength of 380 nm.

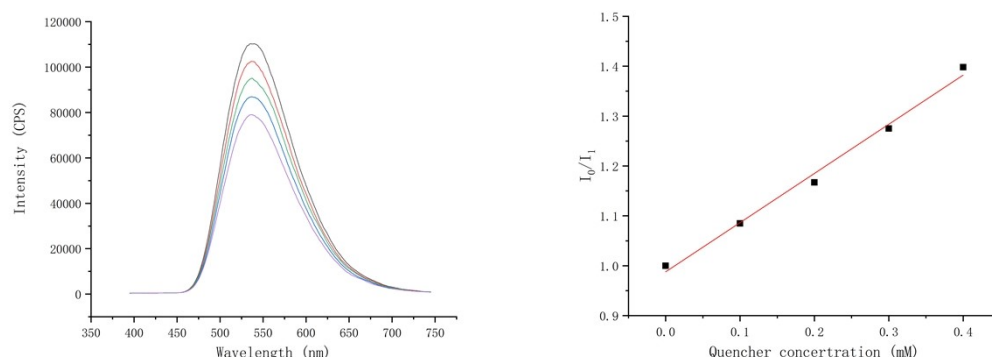**Figure S2.** Luminescence quenching of 4CzIPN by **A**

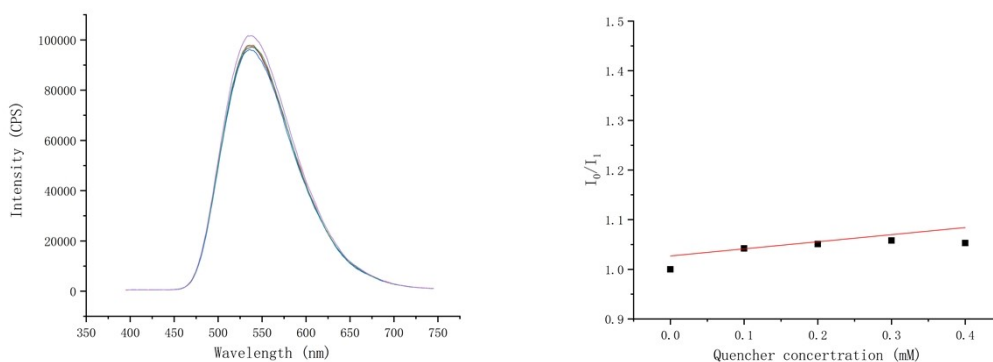

**Figure S3.** Luminescence quenching of 4CzIPN by **2a**

## 5. Analytical Data of the Products

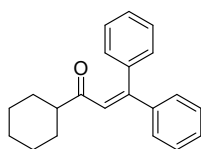

1-cyclohexyl-3,3-diphenylprop-2-en-1-one (**3a**): The compound was purified by flash column chromatography (petroleum ether/EtOAc =50:1) to give the product as a yellow oil, 41.8 mg, 72% yield.  $^1\text{H}$  NMR (500 MHz,  $\text{CDCl}_3$ )  $\delta$  7.40 – 7.27 (m, 8H), 7.22 – 7.14 (m, 2H), 6.62 (s, 1H), 2.25 (tt,  $J$  = 11.6, 3.5 Hz, 1H), 1.84 – 1.68 (m, 4H), 1.62 (d,  $J$  = 10.7 Hz, 1H), 1.35 – 1.27 (m, 2H), 1.19 – 1.08 (m, 3H).  $^{13}\text{C}$  NMR (126 MHz,  $\text{CDCl}_3$ )  $\delta$  204.9, 153.5, 141.3, 139.2, 129.4, 129.3, 128.4, 128.4, 128.4, 128.2, 125.5, 50.9, 28.8, 25.9, 25.8. The data consistent with previously reported literature.<sup>11</sup>

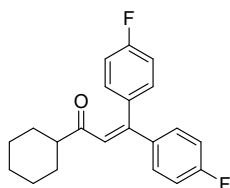

1-cyclohexyl-3,3-bis(4-fluorophenyl)prop-2-en-1-one (**3b**): The compound was purified by flash column chromatography (petroleum ether/EtOAc =50:1) to give the product as a yellow oil, 45.8 mg, 70% yield.  $^1\text{H}$  NMR (500 MHz,  $\text{CDCl}_3$ )  $\delta$  7.28 – 7.24 (m, 2H), 7.17 – 7.11 (m, 2H), 7.04 (dt,  $J$  = 20.5, 8.6 Hz, 4H), 6.59 (s, 1H), 2.31 (tt,  $J$  = 11.5, 3.4 Hz, 1H), 1.86 – 1.72 (m, 4H), 1.68 – 1.59 (m, 1H), 1.36 – 1.30 (m, 2H), 1.22 – 1.15 (m, 3H).  $^{13}\text{C}$  NMR (126 MHz,  $\text{CDCl}_3$ )  $\delta$  204.1, 163.5 (d,  $J$  = 250.5 Hz), 162.8 (d,  $J$  = 248.3 Hz), 151.7, 137.4 (d,  $J$  = 3.5 Hz), 134.8 (d,  $J$  = 3.3 Hz), 131.3 (d,  $J$  = 8.3 Hz), 130.3 (d,  $J$  = 8.4 Hz), 125.0, 115.5 (d,  $J$  = 21.7 Hz), 115.3 (d,  $J$  = 21.5 Hz), 51.2, 28.7, 25.8, 25.8.  $^{19}\text{F}$  NMR (470 MHz,  $\text{CDCl}_3$ )  $\delta$  -111.47, -112.81. HRMS ESI  $[\text{M} + \text{H}]^+$  Calcd for  $\text{C}_{21}\text{H}_{21}\text{F}_2\text{O}$  327.1555, found 327.1546.

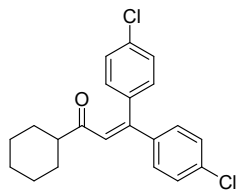

3,3-bis(4-chlorophenyl)-1-cyclohexylprop-2-en-1-one (**3c**): The compound was purified by flash column chromatography (petroleum ether/EtOAc =50:1) to give the product as a yellow oil, 49.5 mg, 69% yield.  $^1\text{H}$  NMR (500 MHz,  $\text{CDCl}_3$ )  $\delta$  7.32 (dd,  $J = 21.1, 8.5$  Hz, 4H), 7.20 (d,  $J = 8.6$  Hz, 2H), 7.09 (d,  $J = 8.4$  Hz, 2H), 6.63 (s, 1H), 2.34 (tt,  $J = 11.4, 3.4$  Hz, 1H), 1.85 – 1.73 (m, 4H), 1.68 – 1.61 (m, 1H), 1.36 – 1.27 (m, 2H), 1.25 – 1.15 (m, 3H).  $^{13}\text{C}$  NMR (126 MHz,  $\text{CDCl}_3$ )  $\delta$  203.8, 151.4, 139.4, 137.1, 135.6, 134.6, 130.7, 129.7, 128.8, 128.5, 125.4, 51.3, 28.6, 25.8, 25.7. HRMS ESI  $[\text{M} + \text{H}]^+$  Calcd for  $\text{C}_{21}\text{H}_{21}\text{Cl}_2\text{O}$  359.0964, found 359.0963.

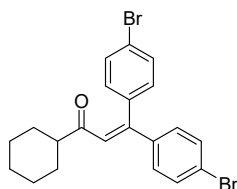

3,3-bis(4-bromophenyl)-1-cyclohexylprop-2-en-1-one (**3d**): The compound was purified by flash column chromatography (petroleum ether/EtOAc =50:1) to give the product as a colorless oil, 53.6 mg, 60% yield.  $^1\text{H}$  NMR (500 MHz,  $\text{CDCl}_3$ )  $\delta$  7.48 (dd,  $J = 20.2, 8.5$  Hz, 4H), 7.13 (d,  $J = 8.5$  Hz, 2H), 7.02 (d,  $J = 8.4$  Hz, 2H), 6.64 (s, 1H), 2.34 (tt,  $J = 11.4, 3.4$  Hz, 1H), 1.88 – 1.73 (m, 4H), 1.68 – 1.61 (m, 1H), 1.35 – 1.29 (m, 2H), 1.25 – 1.16 (m, 3H).  $^{13}\text{C}$  NMR (126 MHz,  $\text{CDCl}_3$ )  $\delta$  203.8, 151.5, 139.8, 137.5, 131.7, 131.5, 131.0, 129.9, 125.4, 124.0, 122.8, 51.3, 28.6, 25.8, 25.7. HRMS ESI  $[\text{M} + \text{H}]^+$  Calcd for  $\text{C}_{21}\text{H}_{21}\text{Br}_2\text{O}$  446.9954, found 446.9960.

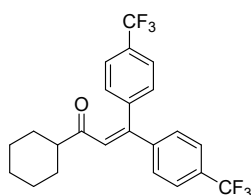

1-cyclohexyl-3,3-bis(4-(trifluoromethyl)phenyl)prop-2-en-1-one (**3e**): The compound was purified by flash column chromatography (petroleum ether/EtOAc =50:1) to give the product as a yellow oil, 54.8 mg, 64% yield.  $^1\text{H}$  NMR (500 MHz,  $\text{CDCl}_3$ )  $\delta$  7.65 (t,  $J = 9.0$  Hz, 2H), 7.57 (s, 1H), 7.50 (dt,  $J = 26.5, 7.8$  Hz, 2H), 7.43 – 7.34 (m, 3H), 6.74 (s, 1H), 2.36 (tt,  $J = 11.4, 3.4$  Hz, 1H), 1.90 – 1.73 (m, 4H), 1.68 – 1.60 (m, 1H), 1.38 – 1.27 (m, 2H), 1.27 – 1.16 (m, 3H).  $^{13}\text{C}$  NMR (126 MHz,  $\text{CDCl}_3$ )  $\delta$  203.46, 150.47, 141.45, 139.12, 132.71, 131.73, 131.23 (q,  $J = 32.8$  Hz), 130.85 (q,  $J = 32.8$  Hz), 129.22, 128.85, 127.17, 126.19 (q,  $J = 3.7$  Hz), 126.03 (q,  $J = 3.8$  Hz), 125.40 (q,  $J = 3.4$  Hz), 123.93 (q,  $J = 272.3$  Hz), 123.81 (q,  $J = 272.6$  Hz), 124.62 (q,  $J = 3.8$  Hz), 51.28, 28.48, 25.78, 25.67.  $^{19}\text{F}$  NMR (470 MHz, Chloroform- $d$ )  $\delta$  -62.60, -62.68. HRMS ESI  $[\text{M} + \text{H}]^+$  Calcd for  $\text{C}_{23}\text{H}_{21}\text{F}_6\text{O}$  427.1491, found 427.1493.

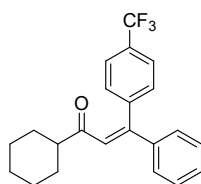

1-cyclohexyl-3-phenyl-3-(4-(trifluoromethyl)phenyl)prop-2-en-1-one (**3f**): The compound was purified by flash column chromatography (petroleum ether/EtOAc =50:1) to give the product as a yellow oil, 47.0 mg, 66% yield.  $^1\text{H}$  NMR (500 MHz,  $\text{CDCl}_3$ )  $\delta$  7.61 (dd,  $J$  = 24.7, 7.9 Hz, 2H), 7.43 – 7.32 (m, 4H), 7.31 – 7.27 (m, 2H), 7.20 – 7.13 (m, 1H), 6.76 (s, 0.64H), 6.64 (s, 0.36H), 2.38 (tt,  $J$  = 11.4, 3.5 Hz, 0.68H), 2.26 (tt,  $J$  = 11.7, 3.5 Hz, 0.42H), 1.90 – 1.73 (m, 4H), 1.68 – 1.60 (m, 1H), 1.35 – 1.23 (m, 3H), 1.22 – 1.12 (m, 2H).  $^{13}\text{C}$  NMR (126 MHz,  $\text{CDCl}_3$ )  $\delta$  204.8, 203.4, 152.6, 151.6, 144.9, 143.1, 140.5, 138.4, 131.1, 130.8, 130.2, 130.0, 129.7, 129.6, 129.4, 128.7, 128.7, 128.6, 128.4, 128.3, 127.2, 125.4 (q,  $J$  = 3.7 Hz), 125.3, 125.1 (q,  $J$  = 3.6 Hz), 125.0, 123.1, 51.4, 50.9, 28.7, 28.6, 25.9, 25.8, 25.7.  $^{19}\text{F}$  NMR (470 MHz,  $\text{CDCl}_3$ )  $\delta$  -62.49, -62.66. The data consistent with previously reported literature.<sup>11</sup>

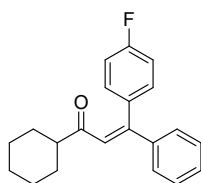

1-cyclohexyl-3-phenyl-3-(4-fluorophenyl)prop-2-en-1-one (**3g**): The compound was purified by flash column chromatography (petroleum ether/EtOAc =50:1) to give the product as a yellow oil, 47.9 mg, 78% yield (*E*:*Z* isomer: 55:45 based on crude product's NMR).  $^1\text{H}$  NMR (500 MHz,  $\text{CDCl}_3$ )  $\delta$  7.41 – 7.32 (m, 3H), 7.30 – 7.26 (m, 2H), 7.20 – 7.13 (m, 2H), 7.09 – 6.98 (m, 2H), 6.64 (s, 0.17H), 6.57 (s, 0.83H), 2.32 (tt,  $J$  = 11.5, 3.4 Hz, 0.18H), 2.23 (tt,  $J$  = 11.6, 3.4 Hz, 0.84H), 1.84 – 1.69 (m, 4H), 1.64 – 1.59 (m, 1H), 1.34 – 1.25 (m, 2H), 1.19 – 1.07 (m, 3H).  $^{13}\text{C}$  NMR (126 MHz,  $\text{CDCl}_3$ )  $\delta$  204.7, 204.3, 163.4 (d,  $J$  = 249.5 Hz), 162.8 (d,  $J$  = 247.6 Hz), 152.8, 152.4, 141.3, 139.0, 137.4 (d,  $J$  = 3.4 Hz), 135.0 (d,  $J$  = 3.2 Hz), 131.3 (d,  $J$  = 8.1 Hz), 130.3 (d,  $J$  = 8.5 Hz), 129.4 (d,  $J$  = 10.9 Hz), 128.5 (d,  $J$  = 9.7 Hz), 128.3, 125.3, 115.4 (d,  $J$  = 29.0 Hz), 115.2 (d,  $J$  = 29.2 Hz), 51.2, 50.8, 28.7 (d,  $J$  = 9.0 Hz), 25.8 (d,  $J$  = 9.3 Hz).  $^{19}\text{F}$  NMR (470 MHz,  $\text{CDCl}_3$ )  $\delta$  -111.87, -113.17. The data consistent with previously reported literature.<sup>11</sup>

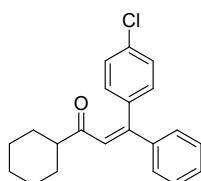

1-cyclohexyl-3-phenyl-3-(4-chlorophenyl)prop-2-en-1-one (**3h**): The compound was purified by flash column chromatography (petroleum ether/EtOAc =50:1) to give the



product as a yellow oil, 50.0 mg, 77% yield (*E:Z* isomer: 54:46 based on crude product's NMR). <sup>1</sup>H NMR (500 MHz, CDCl<sub>3</sub>) δ 7.41 – 7.31 (m, 4H), 7.31 – 7.26 (m, 2H), 7.23 (d, *J* = 8.6 Hz, 1H), 7.19 – 7.08 (m, 2H), 6.63 (d, *J* = 37.1 Hz, 1H), 2.29 (dt, *J* = 57.7, 11.5, 3.4 Hz, 1H), 1.86 – 1.70 (m, 4H), 1.67 – 1.59 (m, 1H), 1.36 – 1.26 (m, 2H), 1.19 – 1.10 (m, 3H). <sup>13</sup>C NMR (126 MHz, CDCl<sub>3</sub>) δ 204.7, 203.9, 152.7, 152.1, 141.0, 139.8, 138.7, 137.6, 135.3, 134.3, 130.8, 129.7, 129.5, 129.4, 128.6, 128.6, 128.5, 128.4, 128.3, 125.7, 125.2, 51.3, 50.8, 28.7, 28.6, 25.9, 25.8, 25.8. The data consistent with previously reported literature.<sup>11</sup>

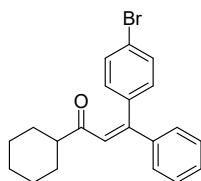

(4-bromophenyl)-1-cyclohexyl-3-phenylprop-2-en-1-one (**3i**): The compound was purified by flash column chromatography (petroleum ether/EtOAc =50:1) to give the product as a yellow oil, 56.0 mg, 76% yield (*E:Z* isomer: 53:47 based on crude product's NMR). <sup>1</sup>H NMR (500 MHz, CDCl<sub>3</sub>) δ 7.48 (dd, *J* = 22.7, 8.5 Hz, 2H), 7.38 (dd, *J* = 5.1, 2.2 Hz, 2H), 7.34 – 7.26 (m, 1H), 7.18 – 7.03 (m, 4H), 6.67 (s, 0.27H), 6.59 (s, 0.73H), 2.35 (tt, *J* = 11.4, 3.4 Hz, 0.30H), 2.23 (tt, *J* = 11.6, 3.3 Hz, 0.78H), 1.87 – 1.70 (m, 4H), 1.67 – 1.60 (m, 1H), 1.37 – 1.24 (m, 3H), 1.20 – 1.10 (m, 2H). <sup>13</sup>C NMR (126 MHz, CDCl<sub>3</sub>) δ 204.8, 203.9, 152.8, 152.2, 140.9, 140.2, 138.7, 138.1, 131.6, 131.3, 131.1, 123.0, 129.6, 129.4, 128.6, 128.5, 128.4, 128.3, 125.8, 125.1, 123.7, 122.5, 51.3, 50.8, 28.7, 28.6, 25.9, 25.9, 25.8. The data consistent with previously reported literature.<sup>11</sup>

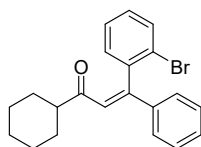

3-(2-bromophenyl)-1-cyclohexyl-3-phenylprop-2-en-1-one (**3j**): The compound was purified by flash column chromatography (petroleum ether/EtOAc =50:1) to give the product as a yellow oil, 29.3 mg, 40% yield (*E:Z* isomer: 88:12 based on crude product's NMR). <sup>1</sup>H NMR (500 MHz, CDCl<sub>3</sub>) δ 7.63 (d, *J* = 8.0 Hz, 1H), 7.35 (d, *J* = 8.5 Hz, 6H), 7.26 – 7.22 (m, 1H), 7.15 (d, *J* = 7.9 Hz, 1H), 6.88 (s, 0.95H), 6.31 (s, 0.05H), 2.39 (tt, *J* = 11.4, 3.4 Hz, 0.96H), 2.30 (tt, *J* = 11.6, 3.5 Hz, 0.05H), 1.93 – 1.72 (m, 4H), 1.66 – 1.60 (m, 1H), 1.38 – 1.24 (m, 3H), 1.23 – 1.14 (m, 2H). <sup>13</sup>C NMR (126 MHz, CDCl<sub>3</sub>) δ 202.8, 151.9, 140.4, 139.0, 132.8, 130.4, 129.5, 129.2, 128.6, 127.6, 127.3, 125.1, 122.4, 51.3, 51.0, 29.8, 28.7, 28.3, 25.9, 25.9, 25.8. The data consistent with previously reported literature.<sup>11</sup>

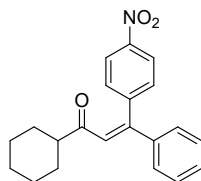

1-cyclohexyl-3-(4-nitrophenyl)-3-phenylprop-2-en-1-one (**3k**): The compound was purified by flash column chromatography (petroleum ether/EtOAc =50:1) to give the product as a yellow oil, 20.6 mg, 31% yield (*E:Z* isomer: 52:48 based on crude product's NMR). <sup>1</sup>H NMR (500 MHz, CDCl<sub>3</sub>) δ 8.15 (dd, *J* = 29.5, 8.3 Hz, 2H), 7.37 (dd, *J* = 23.6, 7.5 Hz, 4H), 7.29 (dd, *J* = 16.9, 8.1 Hz, 1H), 7.22 – 7.07 (m, 2H), 6.76(s,0.27H), 6.61 (s, 0.73H), 2.38 (tt, *J* = 11.1, 3.5 Hz, 0.28H), 2.20 (tt, *J* = 11.7, 3.5 Hz, 0.77H), 1.86 – 1.64 (m, 4H), 1.64 – 1.55 (m, 1H), 1.29 – 1.20 (m, 3H), 1.11 – 1.02 (m, 2H). <sup>13</sup>C NMR (126 MHz, CDCl<sub>3</sub>) δ 204.7, 202.9, 150.4, 148.0, 147.6, 146.6, 139.8, 137.9, 130.0, 130.0, 129.3, 129.2, 129.0, 128.8, 128.6, 128.3, 128.2, 125.1, 123.7, 123.4, 51.6, 50.9, 28.6, 28.4, 25.8, 25.8, 25.7, 25.7. HRMS ESI [M + H]<sup>+</sup> Calcd for C<sub>21</sub>H<sub>22</sub>NO<sub>3</sub> 336.1594, found 336.1597.

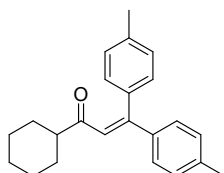

1-cyclohexyl-3,3-di-p-tolylprop-2-en-1-one (**3l**): The compound was purified by flash column chromatography (petroleum ether/EtOAc =50:1) to give the product as a yellow oil, 26.3 mg, 41% yield. <sup>1</sup>H NMR (500 MHz, CDCl<sub>3</sub>) δ 7.22 – 7.10 (m, 6H), 7.06 (d, *J* = 7.8 Hz, 2H), 6.56 (s, 1H), 2.38 (s, 3H), 2.36 (s, 3H), 2.26 (tt, *J* = 11.7, 3.4 Hz, 1H), 1.83 – 1.69 (m, 4H), 1.63 – 1.58 (m, 1H), 1.36 – 1.29 (m, 3H), 1.18 – 1.07 (m, 2H). <sup>13</sup>C NMR (126 MHz, CDCl<sub>3</sub>) δ 204.9, 154.0, 139.5, 138.8, 138.2, 136.4, 129.5, 129.1, 128.8, 128.5, 124.3, 50.9, 28.8, 25.9, 25.8, 21.4, 21.3. The data consistent with previously reported literature.<sup>11</sup>

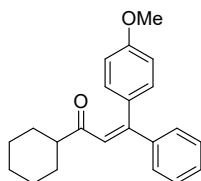

1-cyclohexyl-3-(4-methoxyphenyl)-3-phenylprop-2-en-1-one (**3m**): The compound was purified by flash column chromatography (petroleum ether/EtOAc =50:1) to give the product as a yellow oil, 22.5 mg, 35% yield (*E:Z* isomer: 63:37 based on crude product's NMR). <sup>1</sup>H NMR (500 MHz, CDCl<sub>3</sub>) δ 7.40 – 7.29 (m, 3H), 7.27 – 7.22 (m, 2H), 7.20 – 7.09 (m, 2H), 6.87 (dd, *J* = 23.4, 8.4 Hz, 2H), 6.56 (d, *J* = 25.2 Hz, 1H), 3.83 (d, *J* = 11.6 Hz, 3H), 2.36 – 2.17 (m, 1H), 1.84 – 1.69 (m, 4H), 1.64 – 1.59 (m, 1H), 1.34 – 1.24 (m, 3H), 1.15 – 1.10 (m, 2H). <sup>13</sup>C NMR (126 MHz, CDCl<sub>3</sub>) δ 204.6, 160.7, 153.5, 139.5, 133.6, 131.2, 129.9, 129.4, 128.7, 128.3, 128.2, 128.1, 125.0,

123.6, 113.8, 113.5, 55.4, 55.3, 50.9, 50.8, 29.7, 28.8, 25.9, 25.8. The data consistent with previously reported literature.<sup>11</sup>

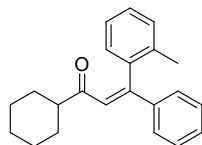

cyclohexyl-3-phenyl-3-(o-tolyl)prop-2-en-1-one (**3n**): The compound was purified by flash column chromatography (petroleum ether/EtOAc =50:1) to give the product as a yellow oil, 40.0 mg, 66% yield (*E:Z* isomer: 83:17 based on crude product's NMR). <sup>1</sup>H NMR (500 MHz, CDCl<sub>3</sub>) δ 7.34 – 7.28 (m, 5H), 7.26 – 7.15 (m, 3H), 7.04 (dd, *J* = 7.4, 1.4 Hz, 1H), 6.80 (s, 0.76H), 6.25 (s, 0.24H), 2.33 – 2.20(m, 1H), 2.07 (d, *J* = 11.5 Hz, 3H), 1.88 – 1.68 (m, 4H), 1.64 – 1.60 (m, 1H), 1.42 – 1.24 (m, 3H), 1.16 – 1.10 (m, 2H). <sup>13</sup>C NMR (126 MHz, CDCl<sub>3</sub>) δ 204.0, 153.0, 139.9, 138.8, 135.7, 130.7, 130.1, 129.7, 129.3, 129.2, 128.8, 128.6, 128.6, 128.3, 128.2, 128.0, 128.0, 127.5, 125.7, 125.7, 125.2, 51.1, 50.7, 29.7, 28.8, 25.9, 25.9, 25.8, 20.4, 19.7. The data consistent with previously reported literature.<sup>11</sup>

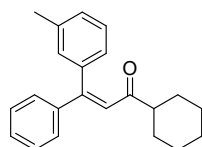

1-cyclohexyl-3-phenyl-3-(m-tolyl)prop-2-en-1-one (**3o**): The compound was purified by flash column chromatography (petroleum ether/EtOAc =50:1) to give the product as a yellow oil, 45.4 mg, 75% yield (*E:Z* isomer: 50:50 based on crude product's NMR). <sup>1</sup>H NMR (500 MHz, CDCl<sub>3</sub>) δ 7.39 – 7.29 (m, 4H), 7.25 – 7.15 (m, 3H), 7.13 – 7.05 (m, 1H), 6.98 (d, *J* = 7.2 Hz, 1H), 6.59 (d, *J* = 8.2 Hz, 1H), 2.34 (d, *J* = 6.9 Hz, 3H), 2.23 (tdd, *J* = 11.6, 6.4, 3.2 Hz, 1H), 1.82 – 1.69 (m, 4H), 1.64 – 1.58 (m, 1H), 1.36 – 1.24 (m, 3H), 1.15 – 1.08 (m, 2H). <sup>13</sup>C NMR (126 MHz, CDCl<sub>3</sub>) δ 205.2, 204.9, 153.7, 153.6, 141.4, 141.3, 139.3, 139.2, 138.0, 137.8, 130.1, 130.0, 129.4, 129.2, 129.1, 129.0, 128.4, 128.4, 128.3, 128.3, 128.1, 128.0, 126.6, 125.7, 125.6, 125.4, 50.8, 50.7, 28.8, 28.8, 25.9, 25.8, 21.4. The data consistent with previously reported literature.<sup>11</sup>

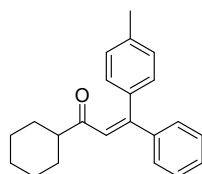

cyclohexyl-3-phenyl-3-(p-tolyl)prop-2-en-1-one (**3p**): The compound was purified by flash column chromatography (petroleum ether/EtOAc =50:1) to give the product as a yellow oil, 36.2 mg, 60% yield (*E:Z* isomer: 58:42 based on crude product's NMR). <sup>1</sup>H NMR (500 MHz, CDCl<sub>3</sub>) δ 7.43 – 7.29 (m, 4H), 7.20 – 7.16 (m, 3H), 7.14 – 7.06 (m, 2H), 6.60 (d, *J* = 14.0 Hz, 1H), 2.38 (d, *J* = 15.1 Hz, 3H), 2.27 (dt, *J* = 23.6, 11.5,

3.5 Hz, 1H), 1.84 – 1.70 (m, 4H), 1.65 – 1.59 (m, 1H), 1.36 – 1.27 (m, 2H), 1.15 – 1.10 (m, 2H). <sup>13</sup>C NMR (126 MHz, CDCl<sub>3</sub>) δ 204.8, 153.6, 141.6, 139.5, 139.4, 138.5, 138.3, 136.2, 129.5, 129.4, 129.2, 129.1, 128.8, 128.5, 128.4, 128.3, 128.3, 128.1, 125.2, 124.6, 50.9, 50.8, 28.8, 28.8, 25.9, 25.8, 21.4, 21.3. The data consistent with previously reported literature.<sup>11</sup>

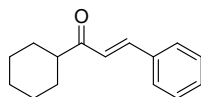

(*E*)-1-cyclohexyl-3-phenylprop-2-en-1-one (**3q**): The compound was purified by flash column chromatography (petroleum ether/EtOAc =50:1) to give the product as a yellow oil, 11.0 mg, 26% yield (*E*:*Z* isomer: 92:8 based on crude product's NMR). <sup>1</sup>H NMR (500 MHz, CDCl<sub>3</sub>) δ 7.64 – 7.50 (m, 3H), 7.42 – 7.34 (m, 3H), 6.82 (d, *J* = 16.0 Hz, 1H), 2.66 (tt, *J* = 11.4, 3.4 Hz, 1H), 1.95 – 1.80 (m, 4H), 1.75 – 1.67 (m, 1H), 1.48 – 1.37 (m, 2H), 1.37 – 1.24 (m, 3H). <sup>13</sup>C NMR (126 MHz, CDCl<sub>3</sub>) δ 203.2, 142.2, 134.8, 130.3, 128.9, 128.3, 124.8, 49.5, 28.8, 25.9, 25.8. The data consistent with previously reported literature.<sup>12</sup>

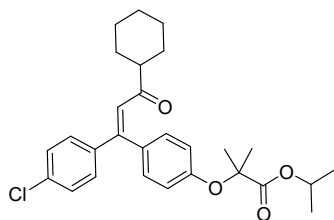

isopropyl 2-(4-(1-(4-chlorophenyl)-3-cyclohexyl-3-oxoprop-1-en-1-yl)phenoxy)-2-methylpropanoate (**3r**): The compound was purified by flash column chromatography (petroleum ether/EtOAc =50:1) to give the product as a yellow oil, 46.9 mg, 50% yield (*E*:*Z* isomer: 61:39 based on crude product's NMR). <sup>1</sup>H NMR (500 MHz, CDCl<sub>3</sub>) δ 7.31 (dd, *J* = 23.4, 8.2 Hz, 2H), 7.17 (dd, *J* = 19.6, 8.6 Hz, 2H), 7.06 (dd, *J* = 22.4, 8.2 Hz, 2H), 6.79 (dd, *J* = 29.4, 8.6 Hz, 2H), 6.61 (s, 0.62H), 6.45 (s, 0.38H), 5.07 (tq, *J* = 12.5, 6.2 Hz, 1H), 2.32 (tt, *J* = 11.5, 3.4 Hz, 0.58H), 2.20 (tt, *J* = 11.8, 3.2 Hz, 0.4H), 1.86 – 1.67 (m, 4H), 1.61 (d, *J* = 8.9 Hz, 7H), 1.36 – 1.24 (m, 3H), 1.22 (dd, *J* = 11.3, 6.2 Hz, 6H), 1.19 – 1.15 (m, 2H). <sup>13</sup>C NMR (126 MHz, CDCl<sub>3</sub>) δ 205.5, 203.7, 173.6, 173.3, 157.0, 156.2, 152.4, 151.5, 150.1, 142.9, 140.2, 137.8, 135.2, 134.2, 134.0, 131.8, 130.8, 130.7, 129.8, 129.4, 128.5, 128.3, 125.8, 123.4, 118.2, 118.1, 79.2, 79.2, 69.2, 69.1, 51.3, 50.6, 28.9, 28.7, 25.9, 25.8, 25.8, 25.8, 25.4, 25.4, 21.6. HRMS ESI [*M* + *H*]<sup>+</sup> Calcd for C<sub>28</sub>H<sub>34</sub>ClO<sub>4</sub> 469.2140, found 469.2140.

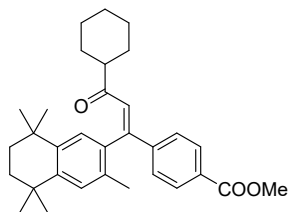

methyl -4-(3-cyclohexyl-3-oxo-1-(3,5,5,8,8-pentamethyl-5,6,7,8-tetrahydronaphthalen-2-yl)prop-1-en-1-yl)benzoate (**3s**): The compound was purified by flash column chromatography (petroleum ether/EtOAc =50:1) to give the product as a yellow oil, 38.9 mg, 41% yield (*E:Z* isomer: 66:34 based on crude product's NMR). <sup>1</sup>H NMR (500 MHz, CDCl<sub>3</sub>) δ 7.97 (t, *J* = 8.8 Hz, 2H), 7.31 (dd, *J* = 69.5, 8.2 Hz, 2H), 7.15 – 6.95 (m, 2H), 6.67 (s, 0.72H), 6.35 (s, 0.28H), 3.90 (d, *J* = 3.0 Hz, 3H), 2.34 (tt, *J* = 11.7, 3.6 Hz, 0.33H), 2.00 (dt, *J* = 11.4, 3.0 Hz, 0.71H), 1.96 (d, *J* = 6.7 Hz, 3H), 1.92 – 1.72 (m, 2H), 1.71 – 1.49 (m, 8H), 1.33 – 1.18 (m, 16H). <sup>13</sup>C NMR (126 MHz, CDCl<sub>3</sub>) δ 206.1, 204.8, 166.8, 166.7, 153.6, 151.3, 145.5, 145.5, 144.6, 144.3, 142.5, 142.5, 138.8, 134.8, 132.8, 132.7, 130.4, 129.8, 129.6, 129.2, 129.2, 128.8, 128.8, 128.4, 128.3, 128.0, 127.9, 127.4, 52.2, 52.1, 51.3, 49.4, 35.2, 35.1, 35.1, 34.1, 34.1, 33.9, 33.9, 31.9, 31.8, 29.7, 28.7, 25.8, 25.8, 25.7, 20.3, 19.5. HRMS ESI [*M* + *H*]<sup>+</sup> Calcd for C<sub>33</sub>H<sub>41</sub>O<sub>3</sub> 473.3050, found 473.3043.

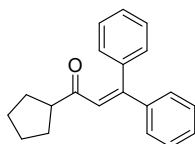

1-cyclopentyl-3,3-diphenylprop-2-en-1-one (**4a**): The compound was purified by flash column chromatography (petroleum ether/EtOAc =50:1) to give the product as a yellow oil, 31.8 mg, 58% yield. <sup>1</sup>H NMR (500 MHz, CDCl<sub>3</sub>) δ 7.43 – 7.28 (m, 8H), 7.23 – 7.14 (m, 2H), 6.64 (s, 1H), 2.83 (p, *J* = 7.9 Hz, 1H), 1.80 – 1.67 (m, 4H), 1.62 (td, *J* = 10.5, 9.8, 4.5 Hz, 2H), 1.54 – 1.48 (m, 2H). <sup>13</sup>C NMR (126 MHz, CDCl<sub>3</sub>) δ 204.2, 153.3, 141.4, 139.2, 129.5, 129.3, 128.4, 128.4, 128.3, 128.1, 125.9, 51.8, 29.4, 26.2. HRMS ESI [*M* + *H*]<sup>+</sup> Calcd for C<sub>20</sub>H<sub>21</sub>O 277.1587, found 277.1583.

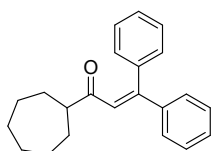

1-cycloheptyl-3,3-diphenylprop-2-en-1-one (**4b**): The compound was purified by flash column chromatography (petroleum ether/EtOAc =50:1) to give the product as a yellow oil, 33.1 mg, 54% yield. <sup>1</sup>H NMR (500 MHz, CDCl<sub>3</sub>) δ 7.41 – 7.28 (m, 8H), 7.18 (dd, *J* = 6.6, 3.0 Hz, 2H), 6.61 (s, 1H), 2.43 (tt, *J* = 9.8, 3.9 Hz, 1H), 1.82 (ddt, *J* = 14.2, 7.2, 3.8 Hz, 2H), 1.71 – 1.63 (m, 2H), 1.53 (dtd, *J* = 13.7, 10.0, 3.5 Hz, 2H), 1.46 (p, *J* = 2.9 Hz, 4H), 1.33 – 1.26 (m, 2H). <sup>13</sup>C NMR (126 MHz, CDCl<sub>3</sub>) δ 205.5, 153.4, 141.3, 139.2, 129.4, 129.2, 128.4, 128.4, 128.2, 125.8, 52.0, 30.2, 28.2, 26.8. HRMS ESI [*M* + *H*]<sup>+</sup> Calcd for C<sub>22</sub>H<sub>25</sub>O 305.1900, found 305.1894.

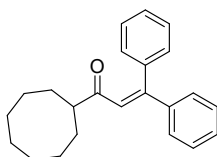

1-cyclooctyl-3,3-diphenylprop-2-en-1-one (**4c**): The compound was purified by flash column chromatography (petroleum ether/EtOAc =50:1) to give the product as a yellow oil, 26.1 mg, 41% yield.  $^1\text{H}$  NMR (500 MHz,  $\text{CDCl}_3$ )  $\delta$  7.41 – 7.35 (m, 4H), 7.36 – 7.28 (m, 5H), 7.21 – 7.17 (m, 2H), 6.59 (s, 1H), 2.49 (tt,  $J$  = 9.4, 3.5 Hz, 1H), 1.76 (ddt,  $J$  = 14.9, 7.7, 3.6 Hz, 2H), 1.67 – 1.59 (m, 3H), 1.56 – 1.49 (m, 2H), 1.42 (dq,  $J$  = 8.1, 3.7 Hz, 3H), 1.37 – 1.26 (m, 4H).  $^{13}\text{C}$  NMR (126 MHz,  $\text{CDCl}_3$ )  $\delta$  206.0, 153.1, 141.3, 139.3, 129.5, 129.2, 128.4, 128.4, 128.3, 126.1, 50.1, 28.7, 26.4, 26.4, 25.6. HRMS ESI  $[\text{M} + \text{H}]^+$  Calcd for  $\text{C}_{23}\text{H}_{27}\text{O}$  319.2056, found 319.2053.

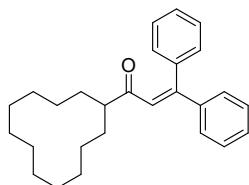

1-cyclododecyl-3,3-diphenylprop-2-en-1-one (**4d**): The compound was purified by flash column chromatography (petroleum ether/EtOAc =50:1) to give the product as a yellow oil, 18.3 mg, 25% yield.  $^1\text{H}$  NMR (500 MHz,  $\text{CDCl}_3$ )  $\delta$  7.40 – 7.27 (m, 8H), 7.20 – 7.15 (m, 2H), 6.59 (s, 1H), 2.54 (p,  $J$  = 6.4 Hz, 1H), 1.58 – 1.53 (m, 2H), 1.47 (dq,  $J$  = 13.6, 6.7 Hz, 2H), 1.32 – 1.20 (m, 14H), 1.20 – 1.16 (m, 2H), 1.10 (dt,  $J$  = 13.2, 6.6 Hz, 2H).  $^{13}\text{C}$  NMR (126 MHz,  $\text{CDCl}_3$ )  $\delta$  206.0, 152.6, 141.4, 139.2, 129.6, 129.2, 128.5, 128.4, 128.4, 128.3, 126.5, 47.1, 29.8, 26.4, 23.7, 23.7, 23.1, 22.8. HRMS ESI  $[\text{M} + \text{H}]^+$  Calcd for  $\text{C}_{27}\text{H}_{35}\text{O}$  375.2682, found 375.2678.

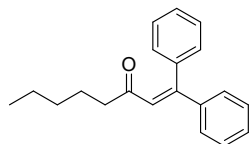

**4e-1**

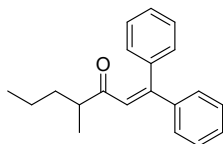

**4e-2**

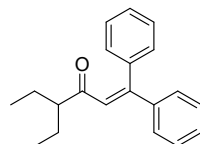

**4e-3**

1,1-diphenyloct-1-en-3-one (**4e-1**), 4-methyl-1,1-diphenylhept-1-en-3-one (**4e-2**), 4-ethyl-1,1-diphenylhex-1-en-3-one (**4e-3**): The compound was purified by flash column chromatography (petroleum ether/EtOAc =50:1) to give the product as a yellow oil, 30.0 mg, 54% total yield (Isomer: 28:61:11 based on crude product's NMR).  $^1\text{H}$  NMR (500 MHz,  $\text{CDCl}_3$ )  $\delta$  7.40 – 7.29 (m, 8H), 7.19 (dt,  $J$  = 7.4, 3.3 Hz, 2H), 6.67 – 6.57 (m, 1H), 2.52 – 2.20 (m, 1H), 1.69 – 1.61 (m, 1H), 1.54 – 1.38 (m, 1H), 1.29 – 1.21 (m, 2H), 1.11 – 0.99 (m, 2H), 0.84 (dt,  $J$  = 14.4, 7.2 Hz, 4H).  $^{13}\text{C}$  NMR (126 MHz,  $\text{CDCl}_3$ )  $\delta$  205.8, 204.7, 202.6, 153.6, 141.4, 141.4, 139.2, 139.2, 129.6, 129.5, 129.5, 129.3, 129.3, 128.5, 128.4, 128.4, 128.3, 128.3, 128.2, 128.1, 127.0, 125.8, 125.6, 55.2, 46.0, 43.2, 35.6, 31.4, 24.2, 20.5, 16.3, 14.1, 14.0, 11.9. HRMS ESI  $[\text{M} + \text{H}]^+$  Calcd for  $\text{C}_{20}\text{H}_{23}\text{O}$  279.1743, found 279.1743.

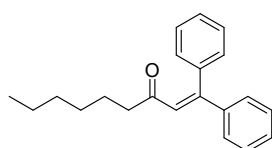

**4f-1**

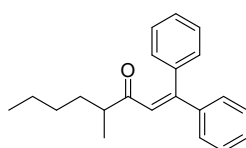

**4f-2**

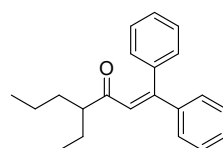

**4f-3**

1,1-diphenylnon-1-en-3-one (**4f-1**), 4-methyl-1,1-diphenyloct-1-en-3-one (**4f-2**), 4-ethyl-1,1-diphenylhept-1-en-3-one (**4f-3**): The compound was purified by flash column chromatography (petroleum ether/EtOAc =50:1) to give the product as a yellow oil, 41.5 mg, 71% total yield (Isomer: 7:47:46 based on crude product's NMR). <sup>1</sup>H NMR (500 MHz, CDCl<sub>3</sub>) δ 7.39 – 7.29 (m, 8H), 7.18 (dd, *J* = 6.6, 3.0 Hz, 2H), 6.64 (s, 0.49H), 6.62 (s, 0.49H), 6.58 (s, 0.02H), 2.45 (h, *J* = 6.9 Hz, 0.48H), 2.36 (tt, *J* = 7.6, 5.7 Hz, 0.47H), 2.23 (t, *J* = 7.5 Hz, 0.03H), 1.68 – 1.54 (m, 2H), 1.49 – 1.30 (m, 1H), 1.30 – 1.18 (m, 3H), 1.02 (d, *J* = 6.9 Hz, 1H), 0.91 – 0.79 (m, 5H). <sup>13</sup>C NMR (126 MHz, CDCl<sub>3</sub>) δ 205.5, 204.8, 153.7, 153.6, 141.4, 141.4, 139.2, 139.2, 129.5, 129.3, 129.3, 128.4, 128.4, 128.4, 128.3, 128.2, 128.1, 125.7, 125.6, 53.5, 46.2, 33.5, 33.1, 29.5, 24.6, 22.8, 20.7, 16.4, 14.3, 14.0, 11.9. HRMS ESI [*M* + *H*]<sup>+</sup> Calcd for C<sub>21</sub>H<sub>25</sub>O 293.1900, found 293.1903.

## 6. Reference

- (1) Zhang, G.; Bai, R. X.; Li, C. H.; Feng, C. G.; Lin, G. Q. *Tetrahedron* **2019**, *72*, 1658-1662.
- (2) Liu, W. Q.; Lei, T.; Zhou, S.; Yang, X. L.; Li, J.; Chen, B.; Wu, L. Z. *J. Am. Chem. Soc.* **2019**, *141*, 13941-13947.
- (3) Cheng, H. C.; Lam, T. L.; Liu, Y.; Tang, Z.; Che, C. M. *Angew. Chem. Int. Ed.* **2021**, *60*, 1383-1389.
- (6) Zhang, H. R.; Xiao, C.; Zhang, S. L.; Zhang, X. *Adv. Synth. Catal.* **2019**, *361*, 5305-5310.
- (4) Pei, C.; Yang, Z.; Koenigs, R. M. *Org. Lett.* **2020**, *22*, 18, 7300-7304.
- (5) Pagire, S. K.; Kumagai, N.; Shibasaki, M. *Org. Lett.* **2020**, *22*, 7853-7858.
- (7) Ritz, M. D.; Parsons, A. M.; Palermo, P. N.; Jones, W. D. *Polyhedron* **2020**, *180*, 114416.
- (8) Wagner, C. E.; Jurutka, P. W.; Marshall, P. A.; Groy, T. L.; Van Der Vaart, A.; Ziller, J. W.; Furnick, J. K.; Graeber, M. E.; Matro, E.; Miguel, B. V.; Tran, I. T.; Kwon, J.; Tedeschi, J. N.; Moosavi, S.; Danshiyar, A.; Philp, J. S.; Khamees, R. O.; Jackson, J. N.; Grupe, D. K.; Badshah, S. L.; Hart, J. W. *J. Med. Chem.* **2009**, *52*, 5950-5966.
- (9) Barthelemy, A. L.; Tuccio, B.; Magnier, E.; Dagousset, G. *Angew. Chem. Int. Ed.* **2019**, *57*, 13790-13794.
- (10) Tang, W. Y.; Chen, L.; Zheng, Z.; Zhan, L. W.; Hou, J.; Li, B. D. *Org. Lett.* **2021**, *23*, 3939-3943.
- (11) Zhao, F.; Li, C. L.; Wu, X. F. *Chem. Commun.* **2020**, *56*, 9182-9185.
- (12) Kerr, W. J.; Mudd, R. J.; Brown, J. A. *Chem. Eur. J.* **2016**, *22*, 4738-4742.

## 7. NMR Spectra of New Compounds and Products

$^1\text{H}$  NMR spectrum of **3a** in  $\text{CDCl}_3$  at 500 MHz

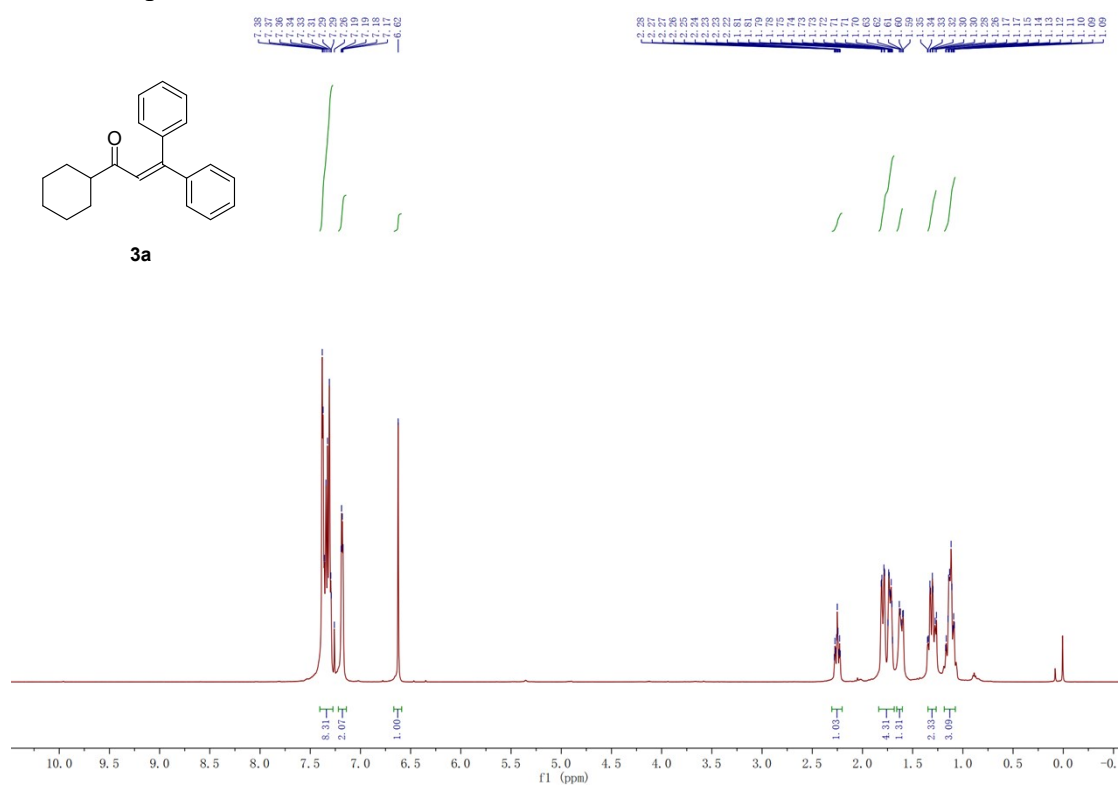

$^{13}\text{C}$  NMR spectrum of **3a** in  $\text{CDCl}_3$  at 126 MHz

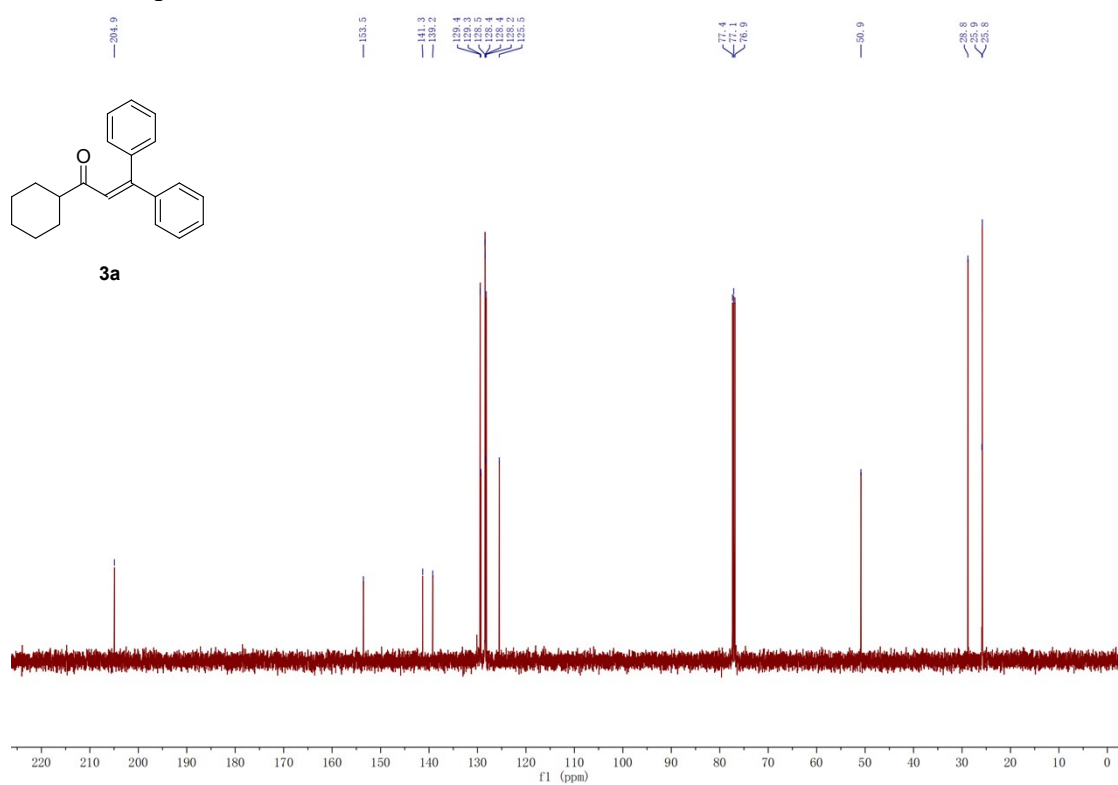



$^1\text{H}$  NMR spectrum of **3b** in  $\text{CDCl}_3$  at 500 MHz

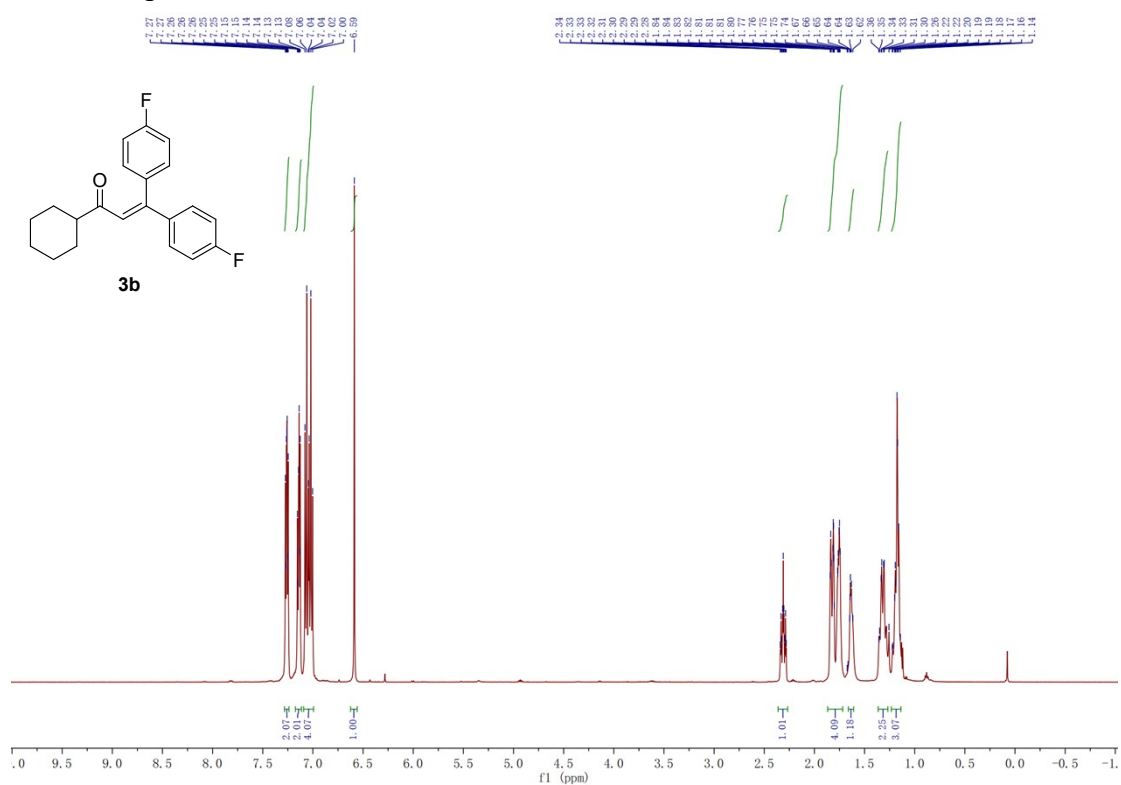

$^{13}\text{C}$  NMR spectrum of **3b** in  $\text{CDCl}_3$  at 126 MHz

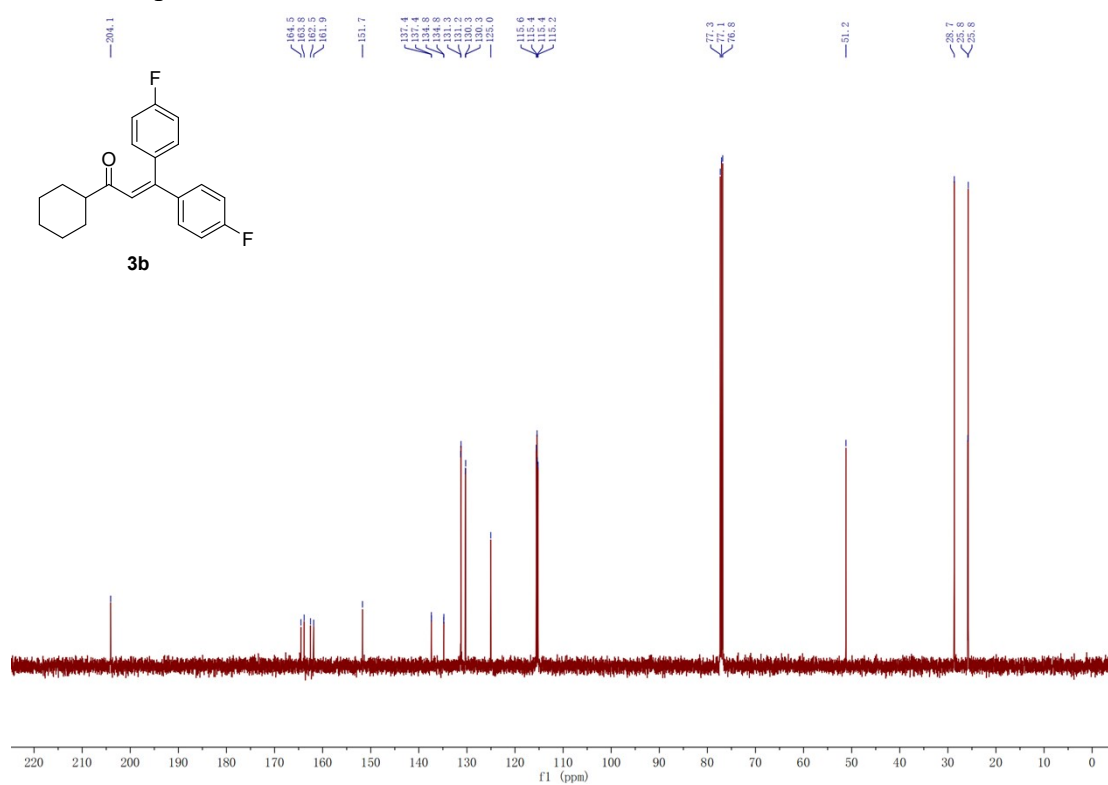

$^{19}\text{F}$  NMR spectrum of **3b** in  $\text{CDCl}_3$  at 470 MHz

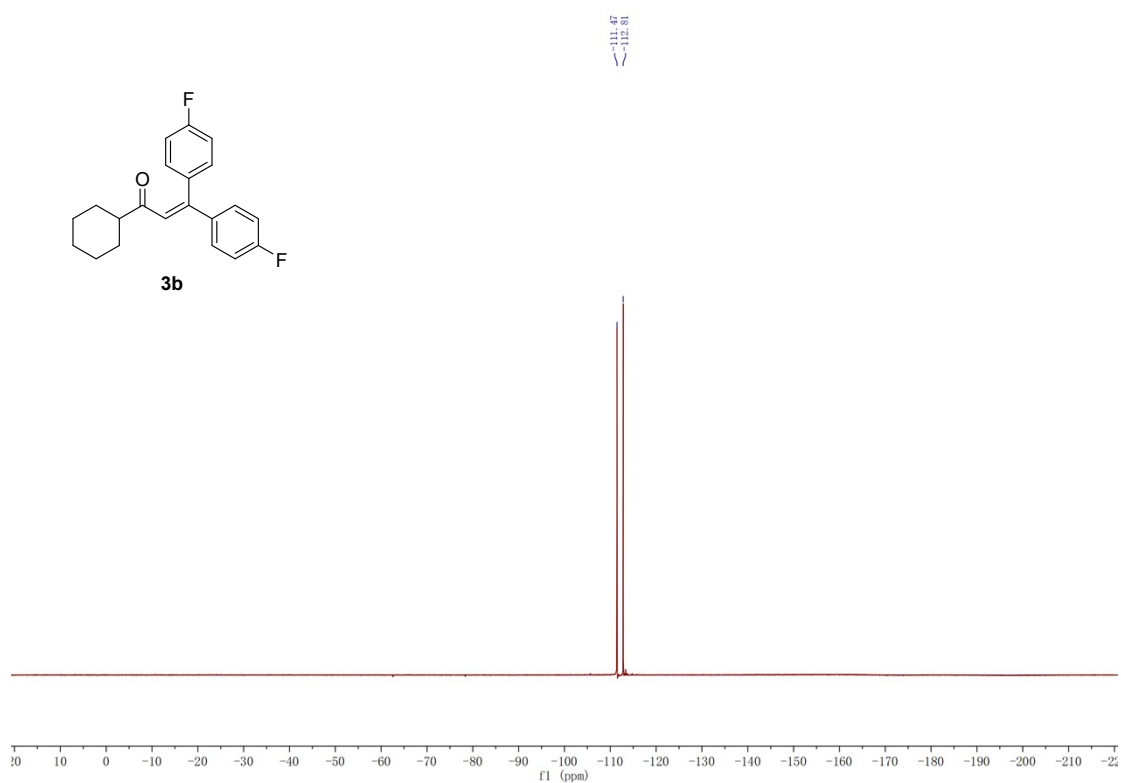

$^1\text{H}$  NMR spectrum of **3c** in  $\text{CDCl}_3$  at 500 MHz

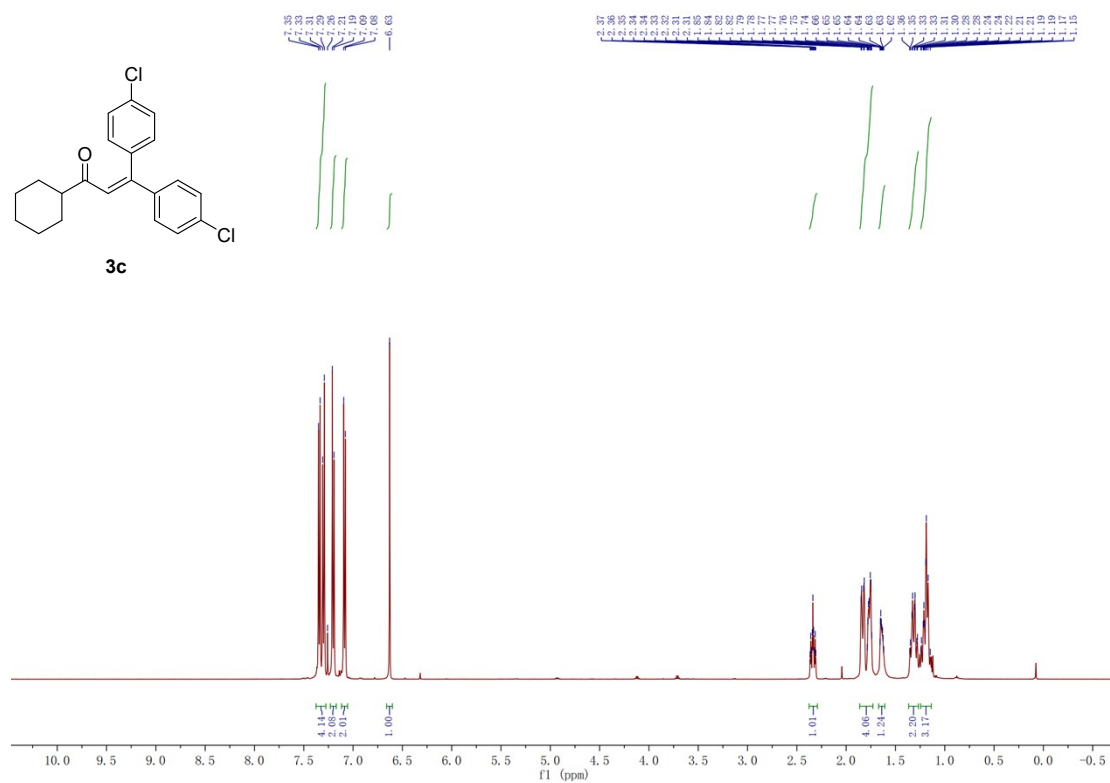

**3d**

<sup>1</sup>H NMR spectrum (CDCl<sub>3</sub>) of compound **3d**. The spectrum shows aromatic signals between 6.5 and 7.6 ppm and aliphatic signals between 1.0 and 2.5 ppm. Integration values are provided below the peaks.

| Chemical Shift (ppm) | Integration |
|----------------------|-------------|
| 7.50                 | 4.07        |
| 7.25                 | 2.06        |
| 7.15                 | 2.05        |
| 6.60                 | 1.00        |
| 2.45                 | 1.02        |
| 1.85                 | 4.14        |
| 1.75                 | 1.11        |
| 1.45                 | 2.22        |
| 1.35                 | 3.12        |

$^{13}\text{C}$  NMR spectrum of **3d** in  $\text{CDCl}_3$  at 126 MHz

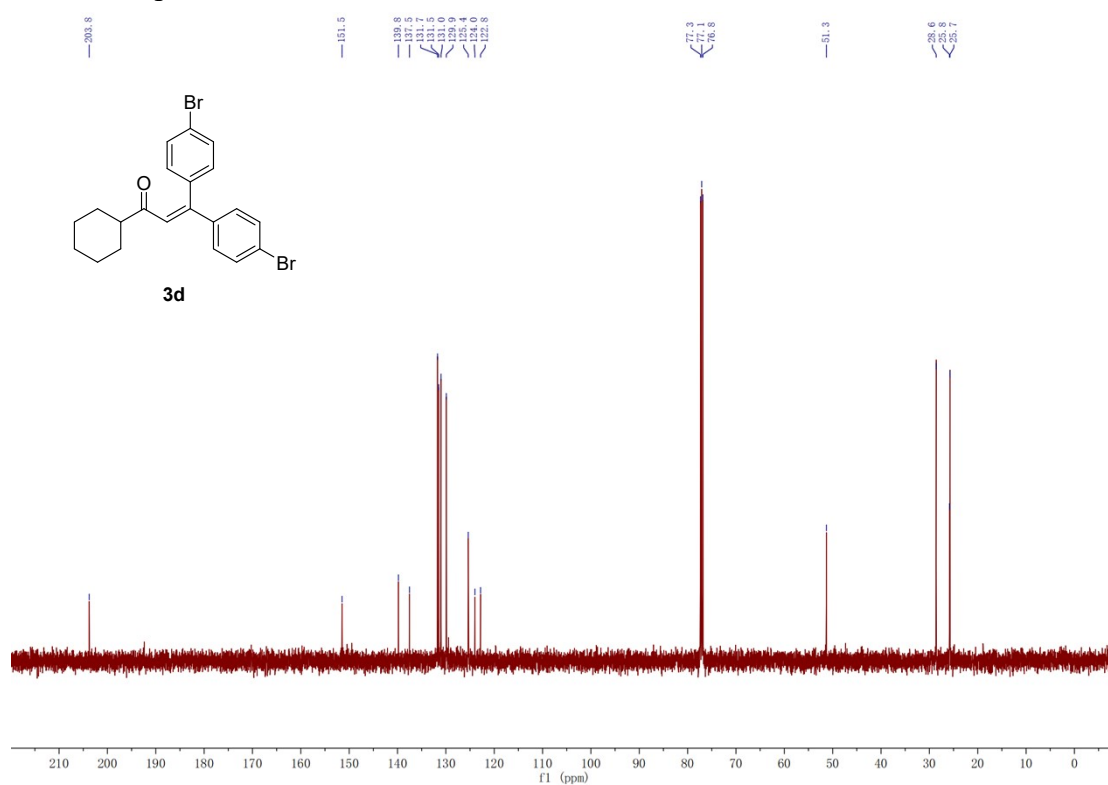

$^1\text{H}$  NMR spectrum of **3e** in  $\text{CDCl}_3$  at 500 MHz

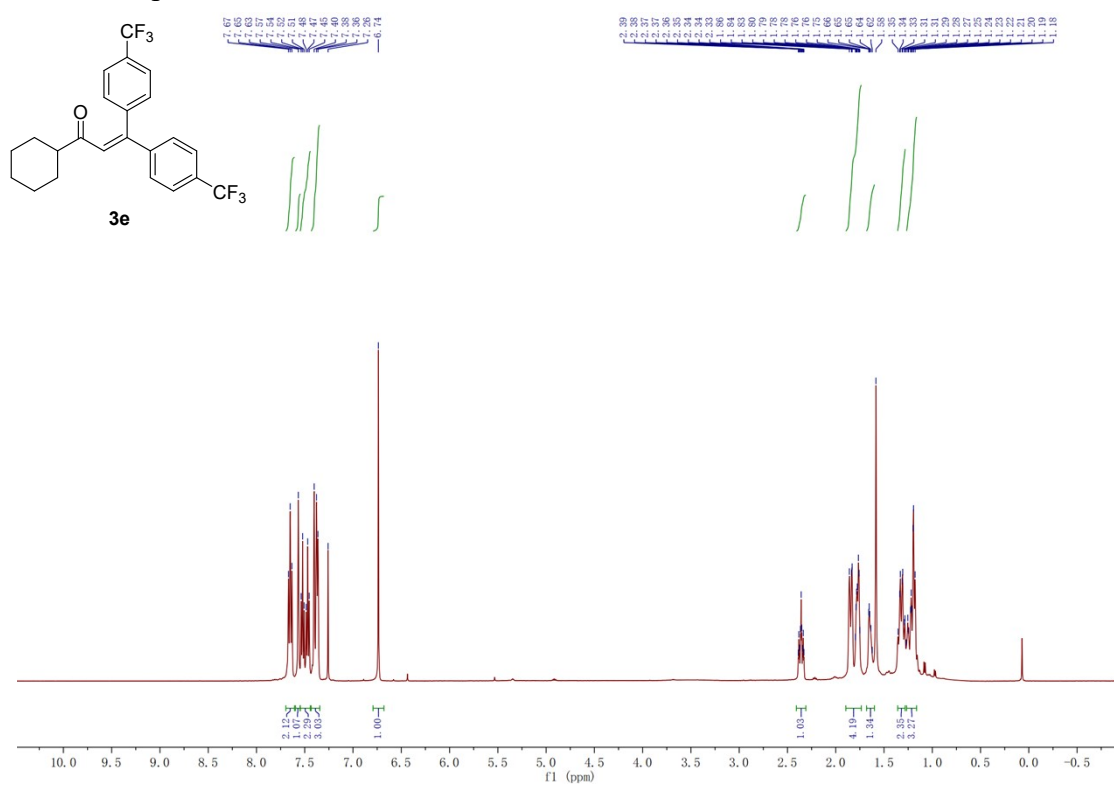

[illegible]

**3e**

Chemical structure of **3e** is shown above the spectrum. The structure is a cyclohexylidene group attached to a propenyl chain, which is further substituted with a 4-(trifluoromethyl)phenyl group and a 4-(trifluoromethyl)phenyl group.

The spectrum displays a single sharp peak at approximately 62 ppm, labeled **f1 (ppm)** on the x-axis. The x-axis ranges from 0 to -170 ppm.

$^1\text{H}$  NMR spectrum of **3f** in  $\text{CDCl}_3$  at 500 MHz

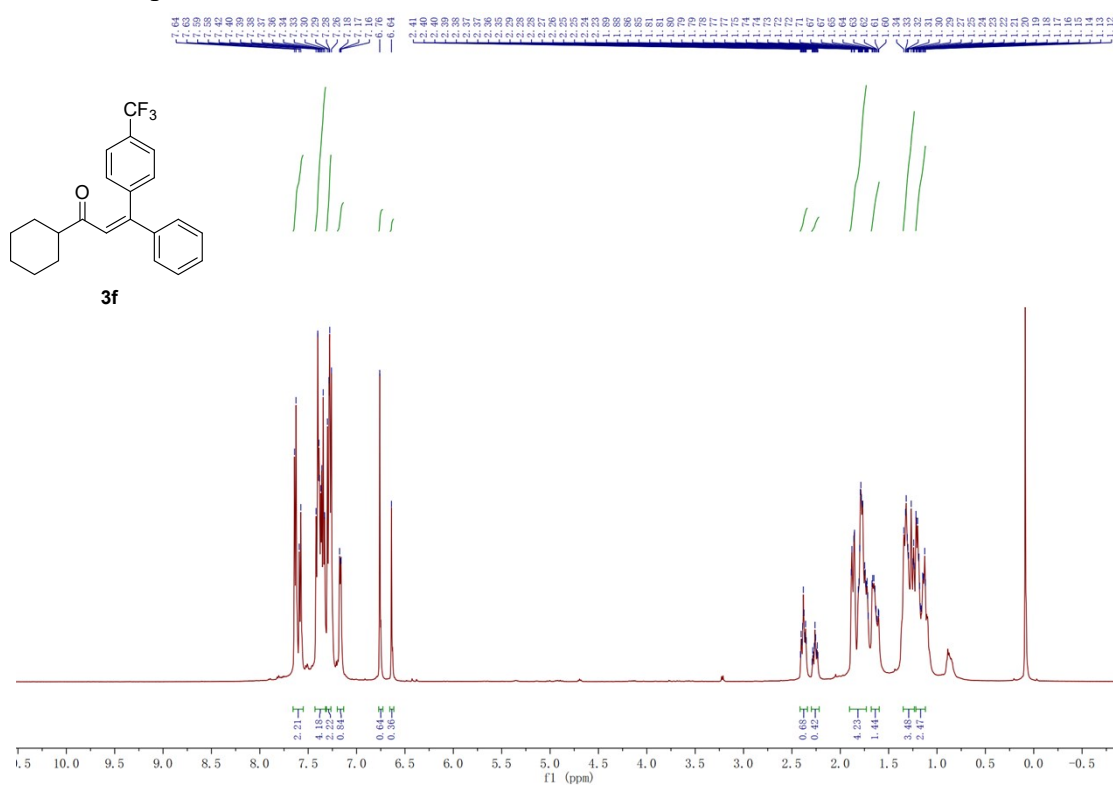

$^{13}\text{C}$  NMR spectrum of **3f** in  $\text{CDCl}_3$  at 126 MHz

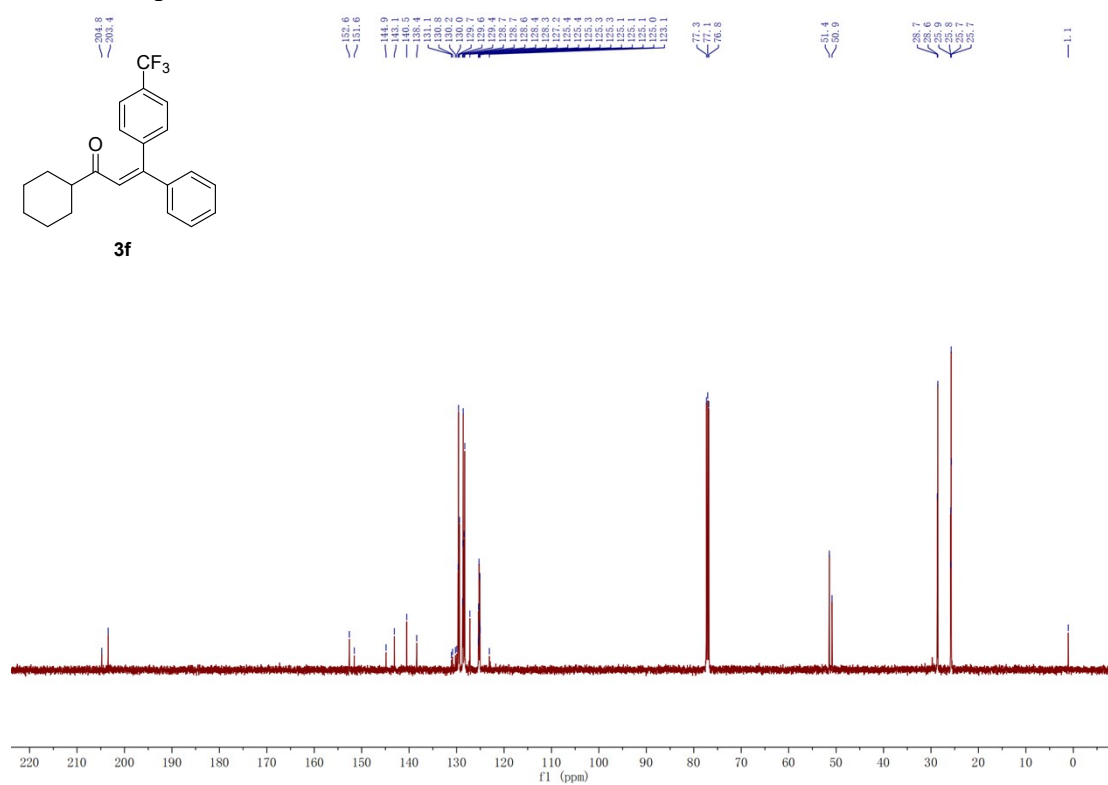

$^{19}\text{F}$  NMR spectrum of **3f** in  $\text{CDCl}_3$  at 470 MHz

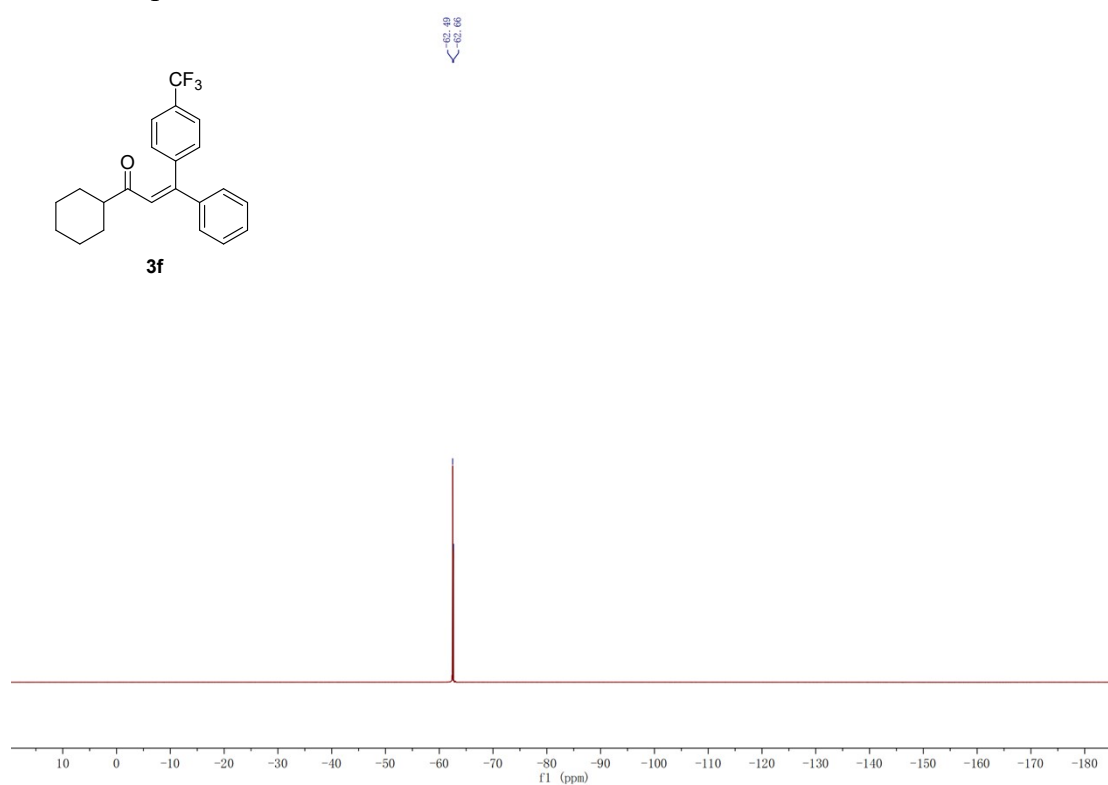

$^1\text{H}$  NMR spectrum of **3g** in  $\text{CDCl}_3$  at 500 MHz

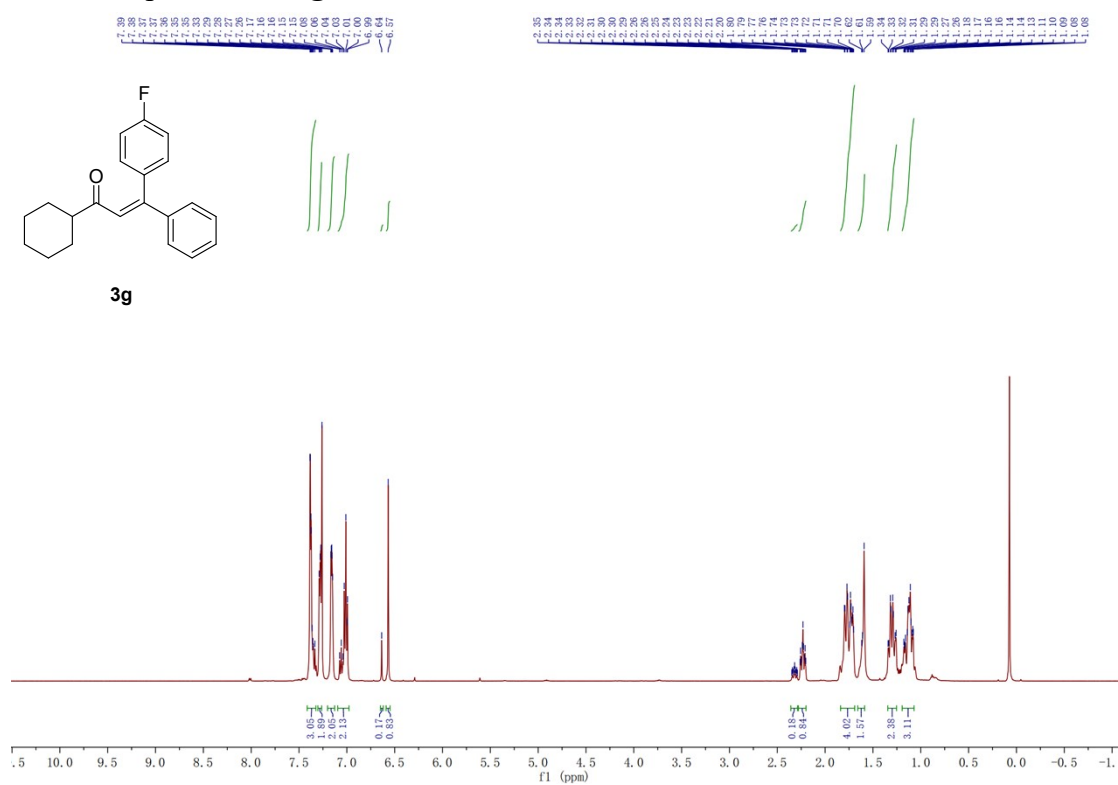

$^{13}\text{C}$  NMR spectrum of **3g** in  $\text{CDCl}_3$  at 126 MHz

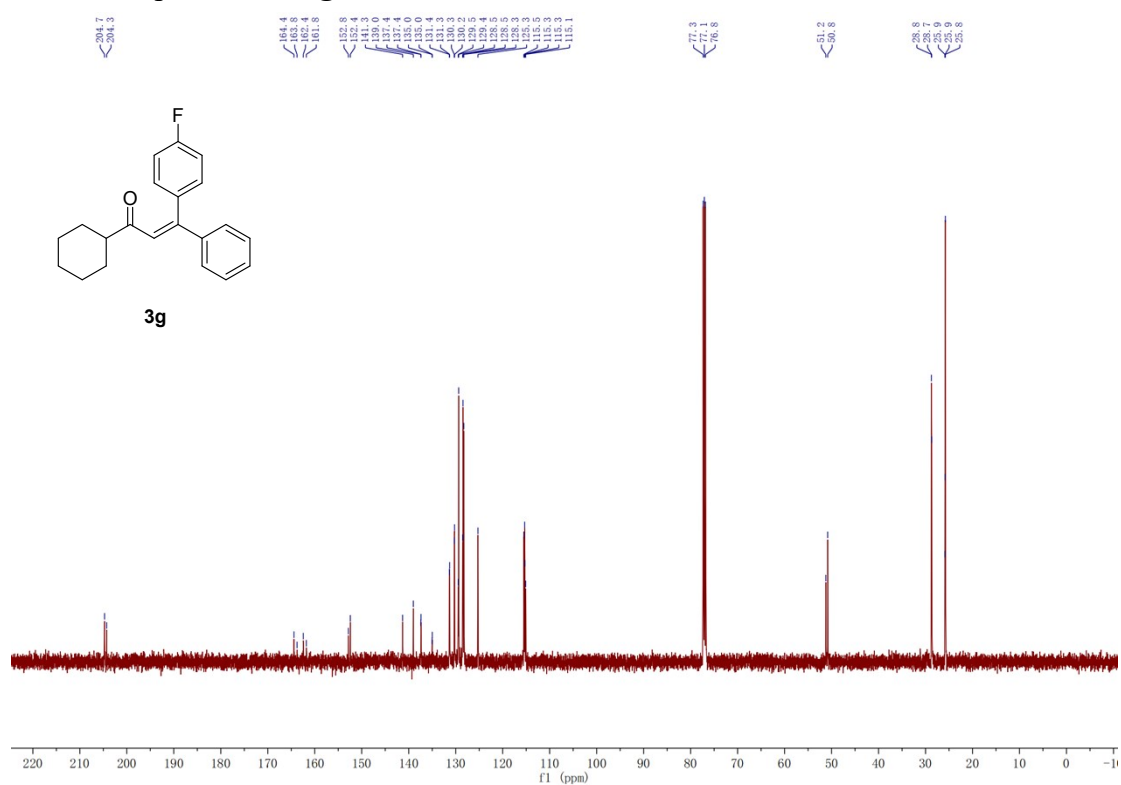

$^{19}\text{F}$  NMR spectrum of **3g** in  $\text{CDCl}_3$  at 470 MHz

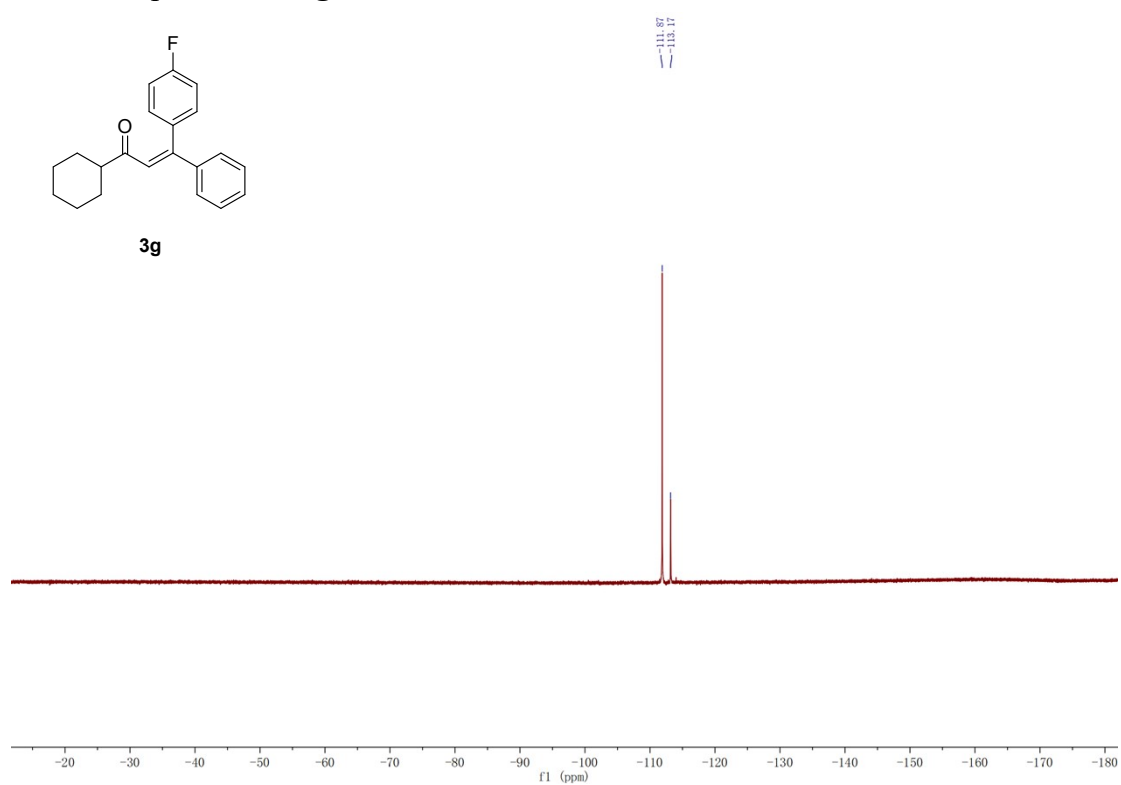



$^1\text{H}$  NMR spectrum of **3h** in  $\text{CDCl}_3$  at 500 MHz

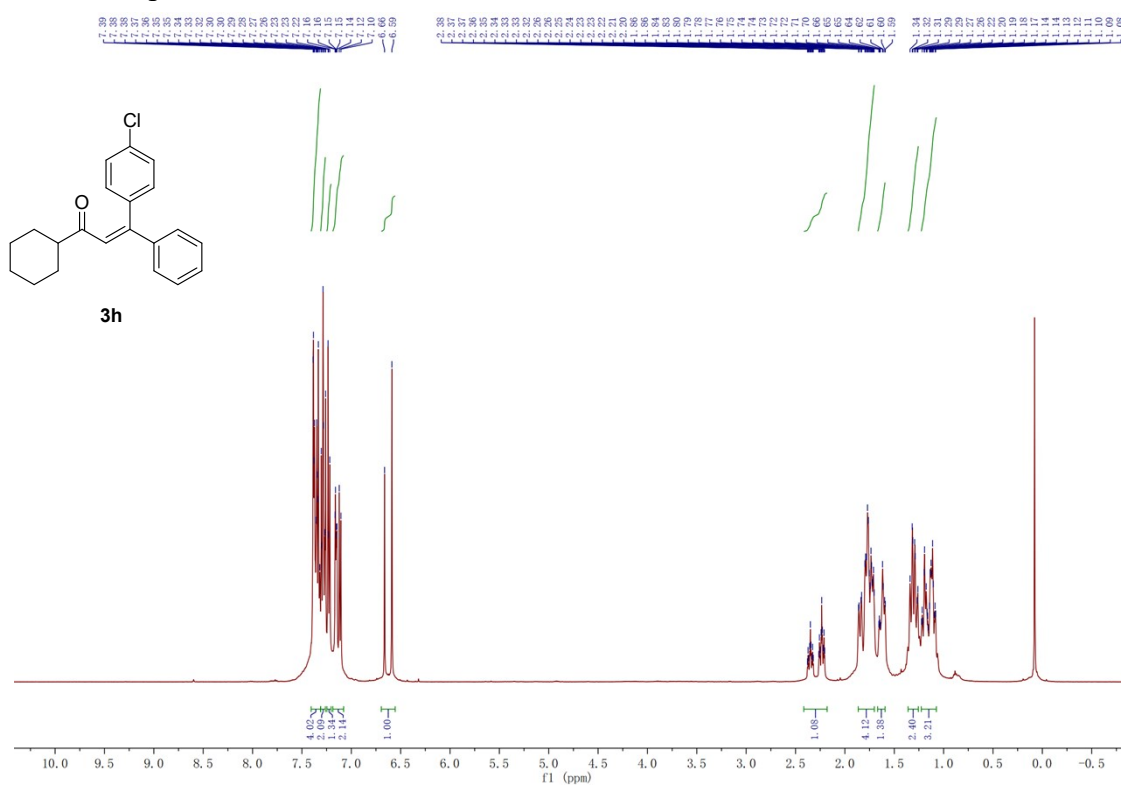

$^{13}\text{C}$  NMR spectrum of **3h** in  $\text{CDCl}_3$  at 126 MHz

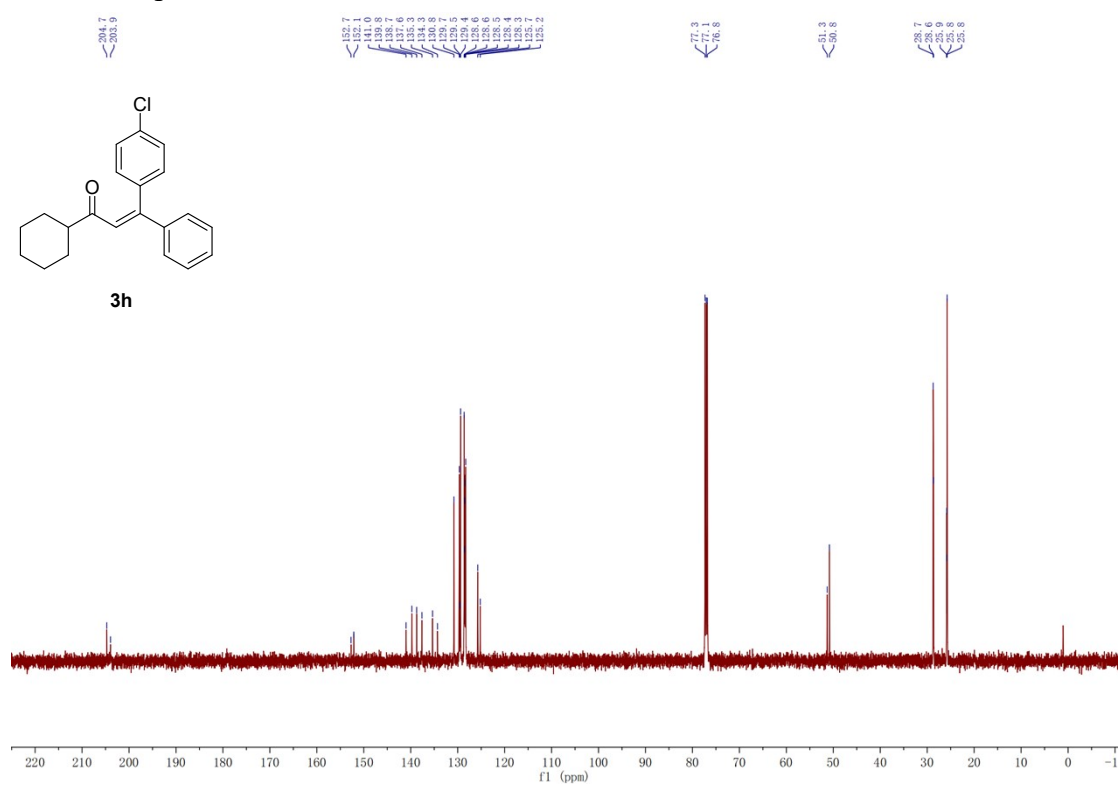

$^1\text{H}$  NMR spectrum of **3i** in  $\text{CDCl}_3$  at 500 MHz

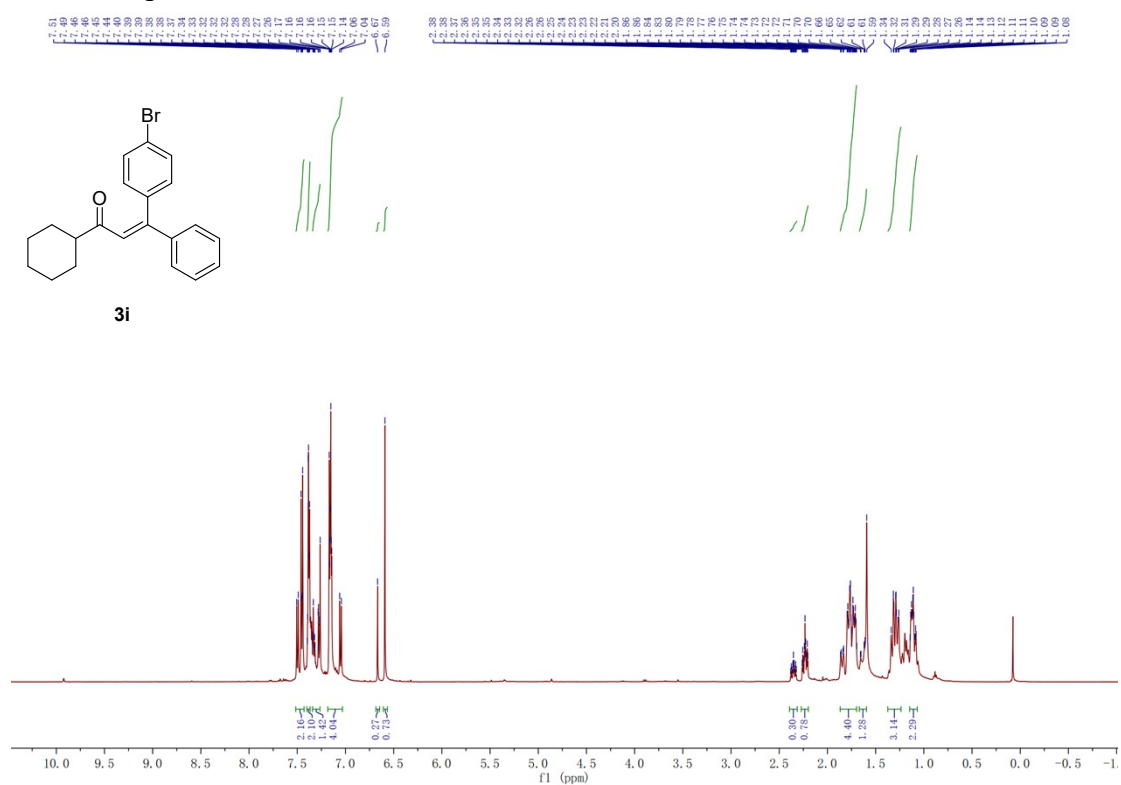

$^{13}\text{C}$  NMR spectrum of **3i** in  $\text{CDCl}_3$  at 126 MHz

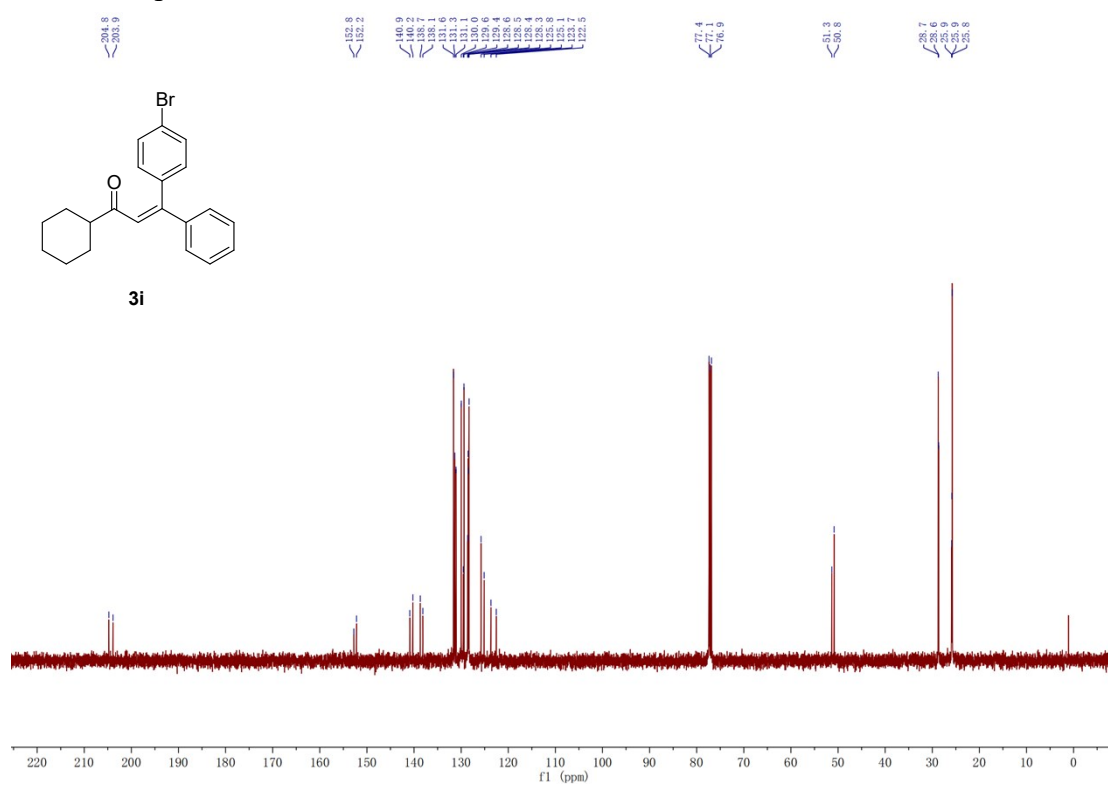

**3j**

BrC1=CC=C(C=C1)/C=C(C2=CC=CC=C2)C(=O)C3CCCCC3

1.00  
6.05  
1.20  
1.01  
0.95  
0.05  
0.96  
0.05  
4.00  
1.45  
8.44  
2.71

**3j**

Chemical structure of **3j** is shown above the spectrum. The spectrum displays peaks from 0 to 230 ppm. Key peaks are labeled with their chemical shifts: 202.8, 151.9, 148.1, 139.0, 132.8, 130.5, 129.5, 129.2, 128.6, 127.3, 125.1, 122.1, 77.1, 77.0, 76.9, 51.3, 29.0, 28.3, 27.9, 27.3, 26.6, and 0.

[illegible]

**3k**

$^1\text{H}$  NMR spectrum of **31** in  $\text{CDCl}_3$  at 500 MHz

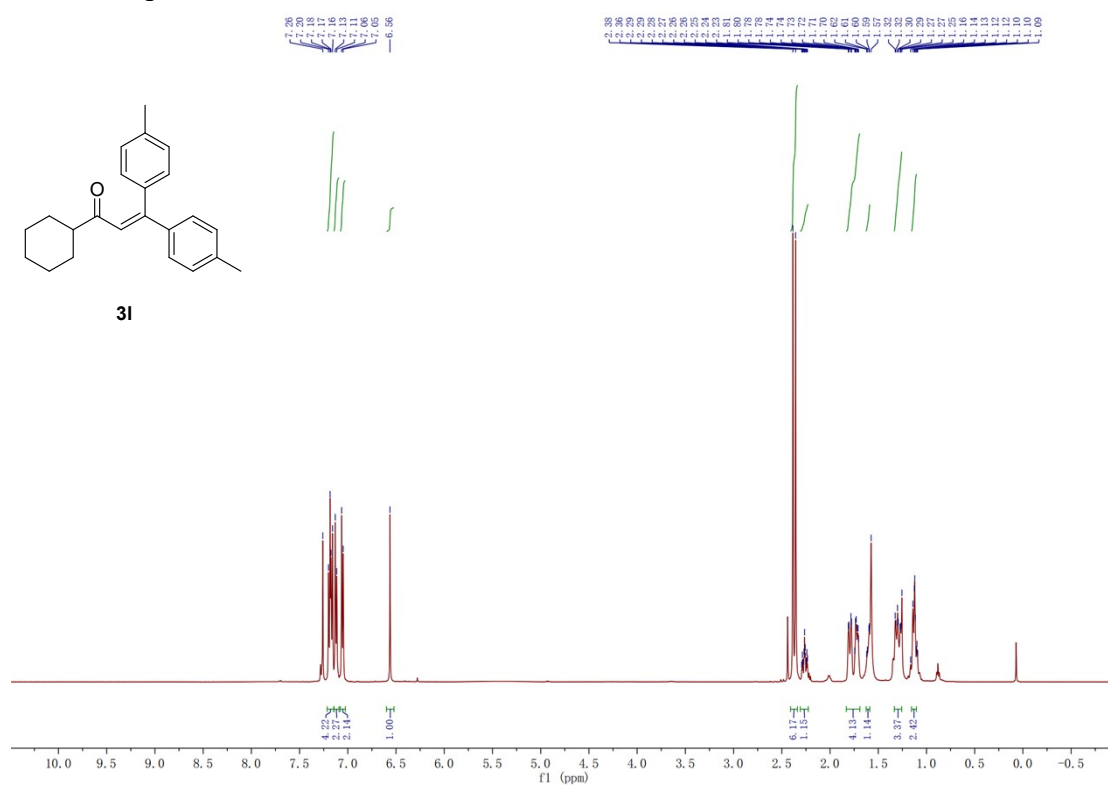

$^{13}\text{C}$  NMR spectrum of **31** in  $\text{CDCl}_3$  at 126 MHz

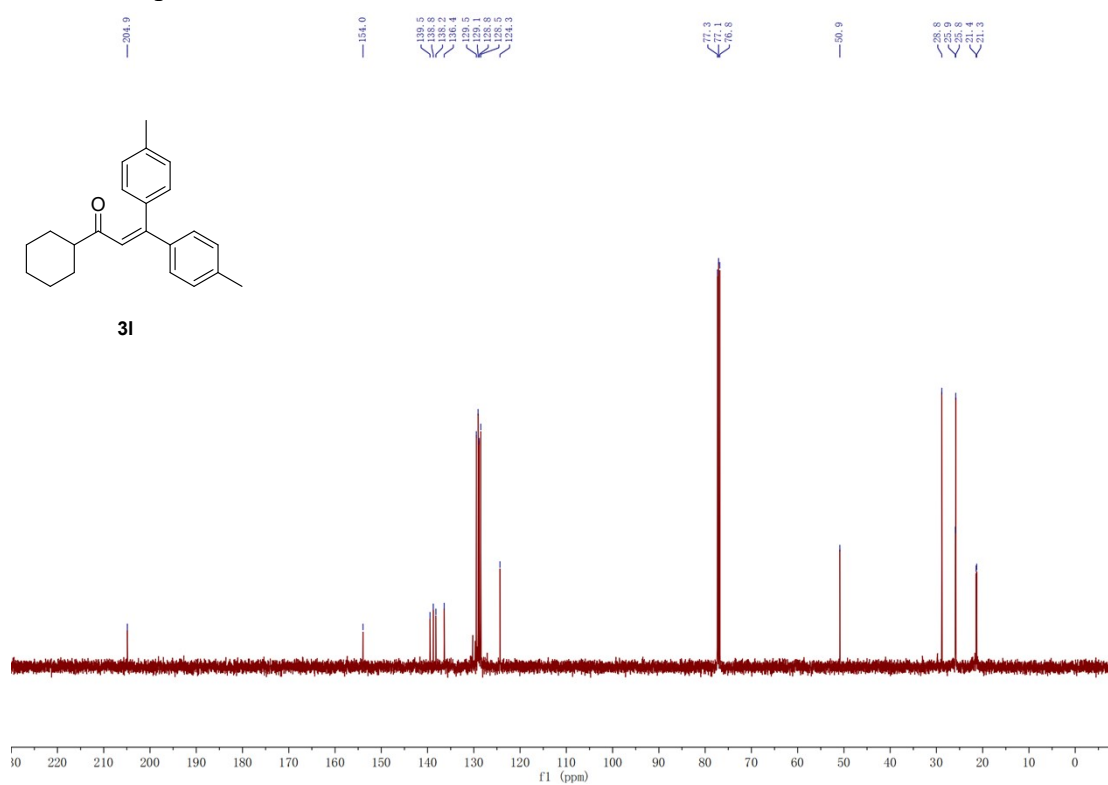

$^1\text{H}$  NMR spectrum of **3m** in  $\text{CDCl}_3$  at 500 MHz

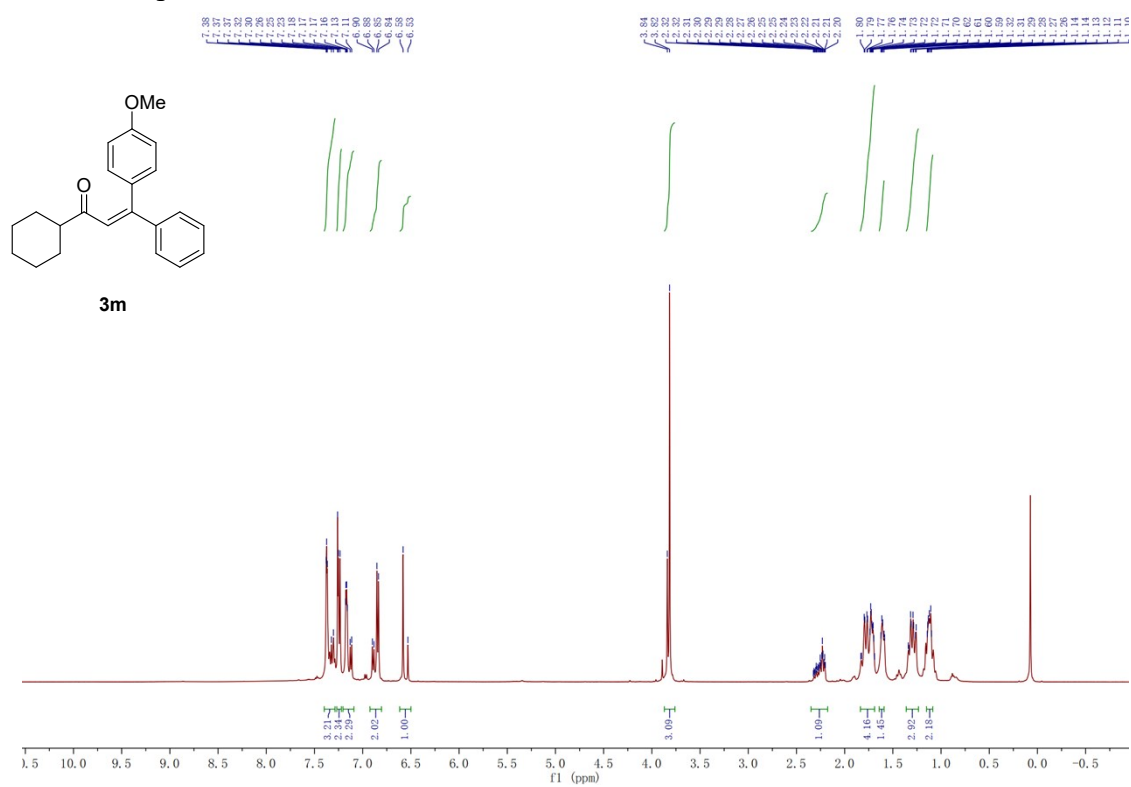

$^{13}\text{C}$  NMR spectrum of **3m** in  $\text{CDCl}_3$  at 126 MHz

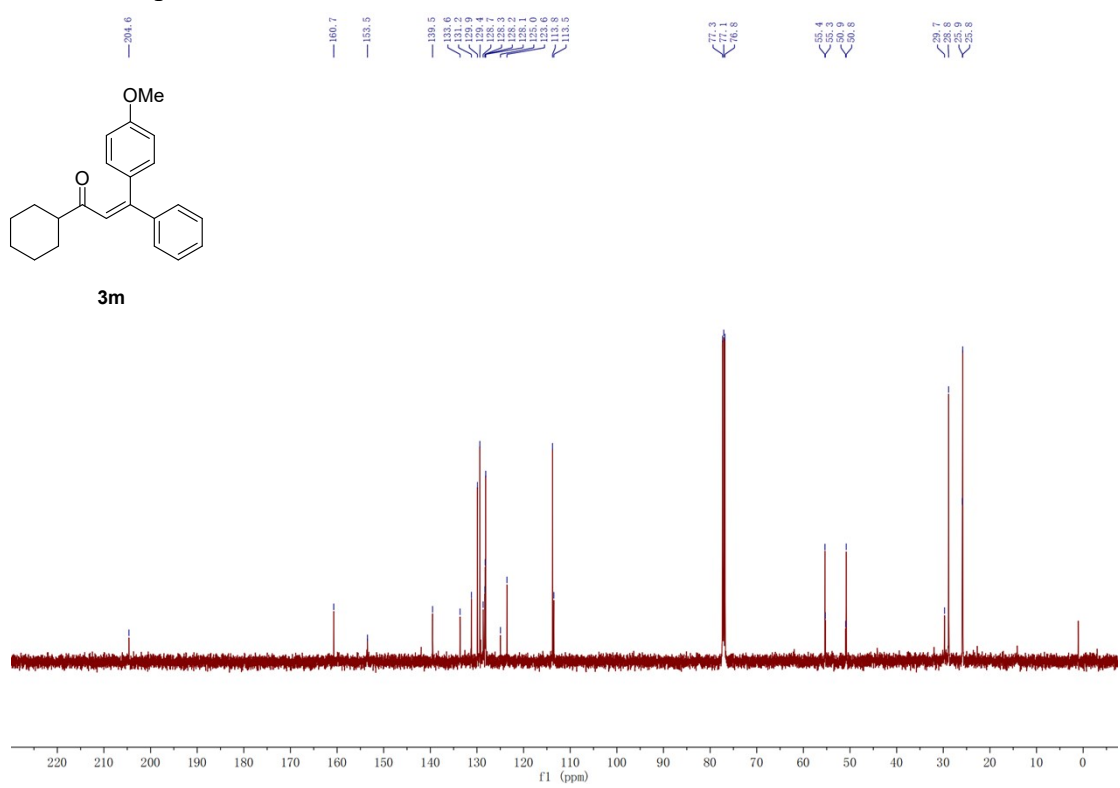

$^1\text{H}$  NMR spectrum of **3n** in  $\text{CDCl}_3$  at 500 MHz

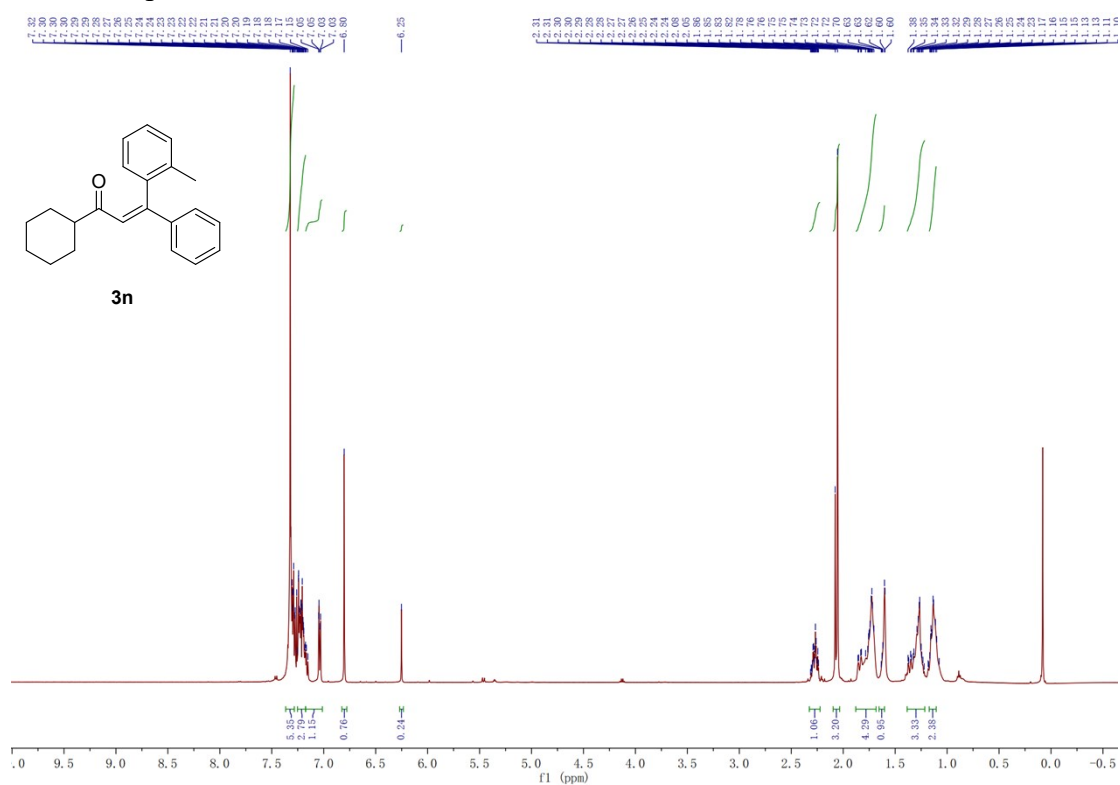

$^{13}\text{C}$  NMR spectrum of **3n** in  $\text{CDCl}_3$  at 126 MHz

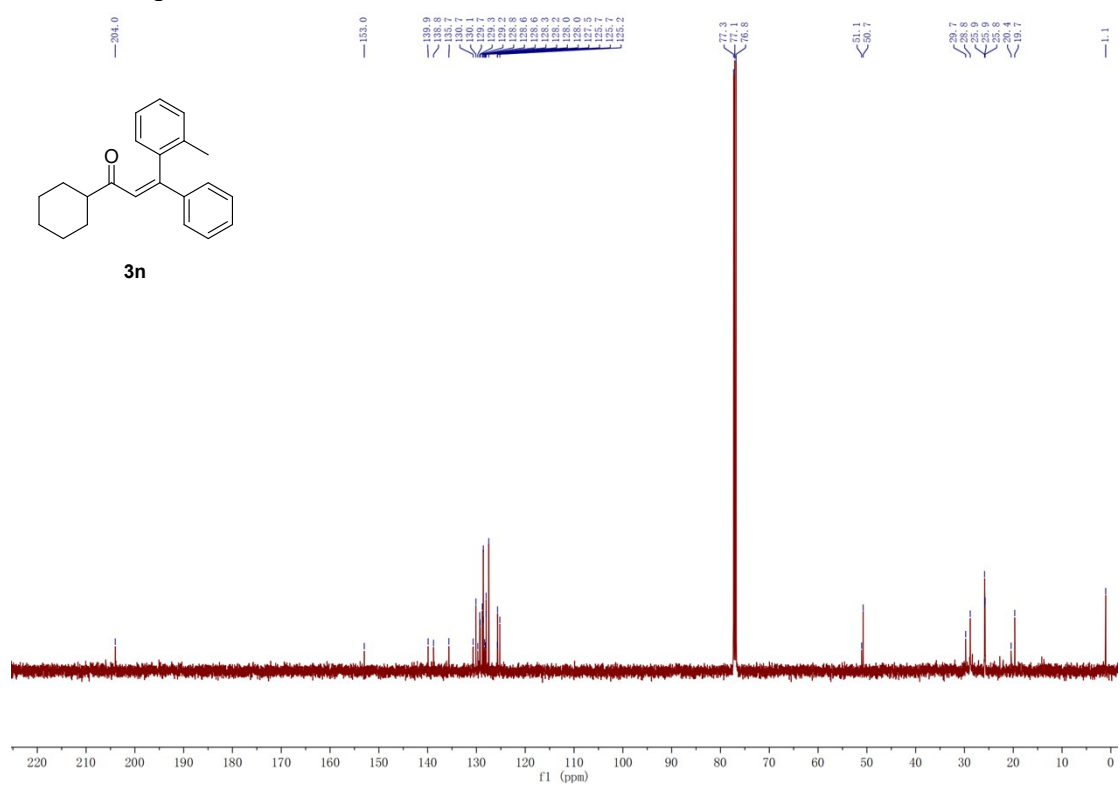

$^1\text{H}$  NMR spectrum of **3o** in  $\text{CDCl}_3$  at 500 MHz

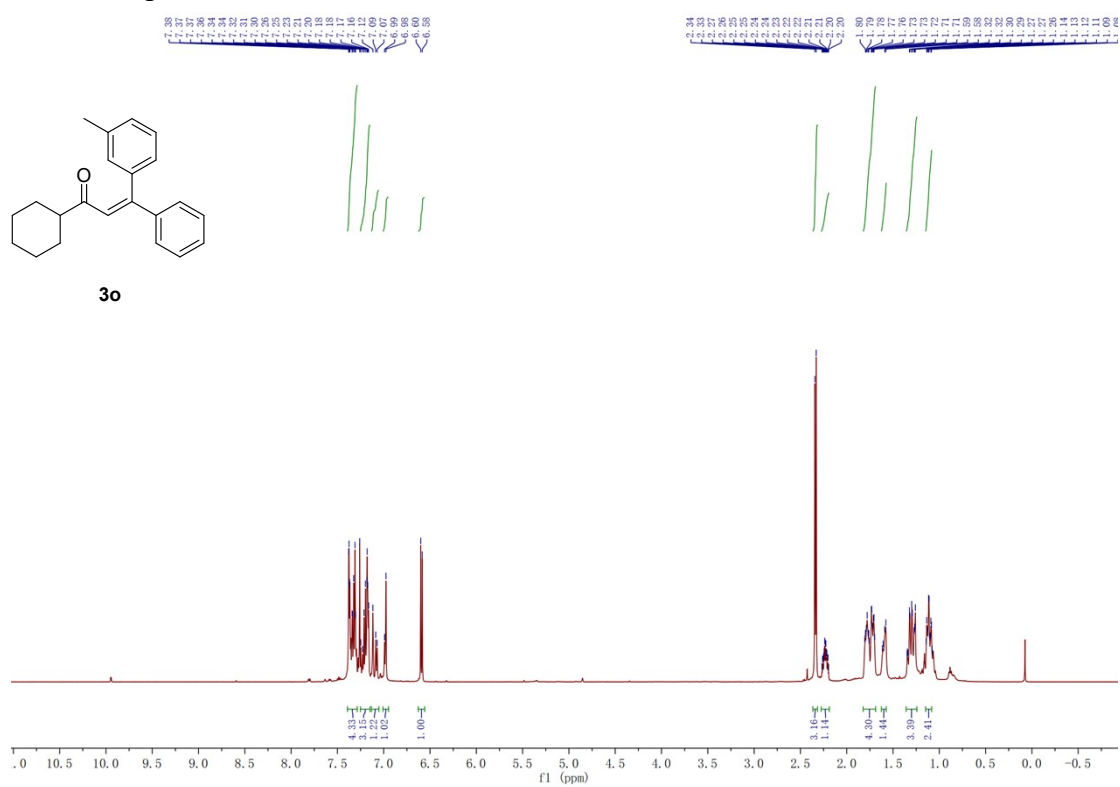

$^{13}\text{C}$  NMR spectrum of **3o** in  $\text{CDCl}_3$  at 126 MHz

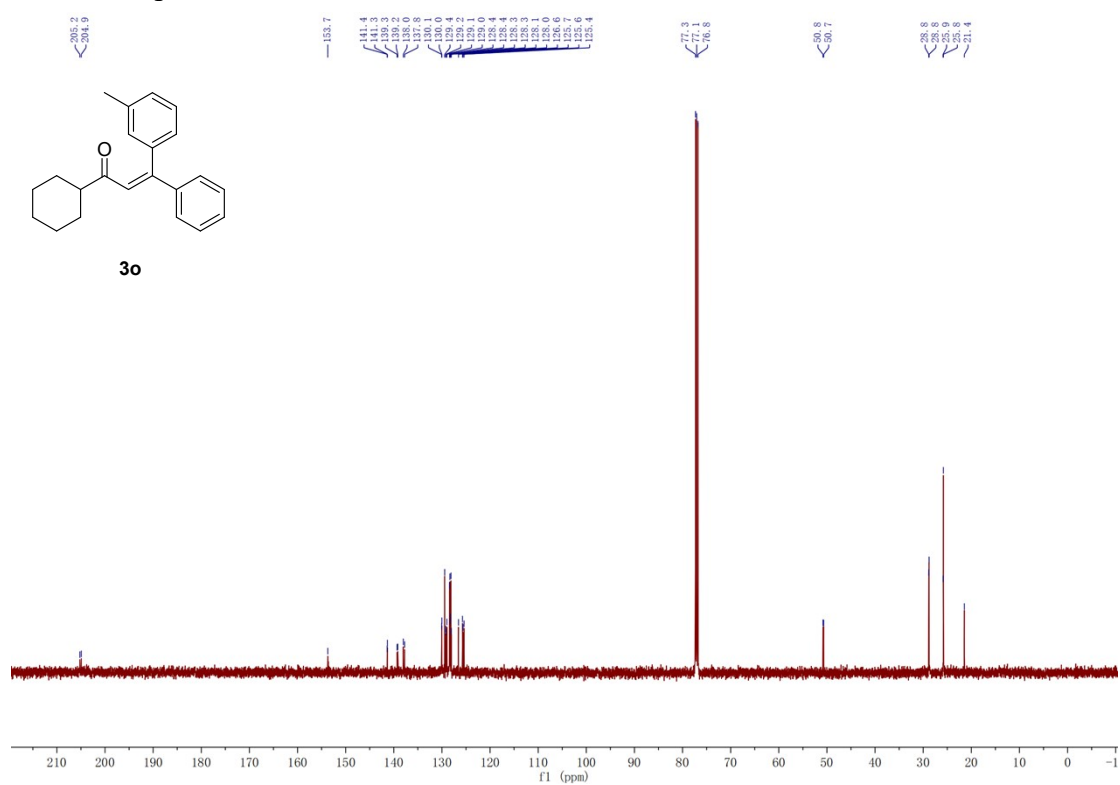



[illegible]

**3p**

<sup>13</sup>C NMR spectrum (ppm) of compound **3p**. The spectrum shows peaks corresponding to the chemical structure, including aromatic and aliphatic carbons. Key peaks are labeled with their chemical shifts: 204.8, 158.6, 141.6, 139.9, 138.9, 138.5, 136.2, 135.2, 133.9, 133.5, 132.9, 132.7, 132.0, 131.1, 130.9, 130.5, 129.5, 128.8, 128.4, 126.2, 125.3, 124.8, 124.2, 77.3, 77.1, 76.9, 50.9, 50.5, 29.8, 29.5, 29.2, 28.9, 28.6, 28.3, 28.0, 27.7, 27.4, 27.1, 26.8, 26.5, 26.2, 25.9, 25.6, 25.3, 25.0, 24.7, 24.4, 24.1, 23.8, 23.5, 23.2, 22.9, 22.6, 22.3, 22.0, 21.7, 21.4, 21.1, 20.8, 20.5, 20.2, 19.9, 19.6, 19.3, 19.0, 18.7, 18.4, 18.1, 17.8, 17.5, 17.2, 16.9, 16.6, 16.3, 16.0, 15.7, 15.4, 15.1, 14.8, 14.5, 14.2, 13.9, 13.6, 13.3, 13.0, 12.7, 12.4, 12.1, 11.8, 11.5, 11.2, 10.9, 10.6, 10.3, 10.0, 9.7, 9.4, 9.1, 8.8, 8.5, 8.2, 7.9, 7.6, 7.3, 7.0, 6.7, 6.4, 6.1, 5.8, 5.5, 5.2, 4.9, 4.6, 4.3, 4.0, 3.7, 3.4, 3.1, 2.8, 2.5, 2.2, 1.9, 1.6, 1.3, 1.0, 0.7, 0.4, 0.1, -0.2, -0.5, -0.8, -1.1, -1.4, -1.7, -2.0, -2.3, -2.6, -2.9, -3.2, -3.5, -3.8, -4.1, -4.4, -4.7, -5.0, -5.3, -5.6, -5.9, -6.2, -6.5, -6.8, -7.1, -7.4, -7.7, -8.0, -8.3, -8.6, -8.9, -9.2, -9.5, -9.8, -10.1.

$^1\text{H}$  NMR spectrum of **3q** in  $\text{CDCl}_3$  at 500 MHz

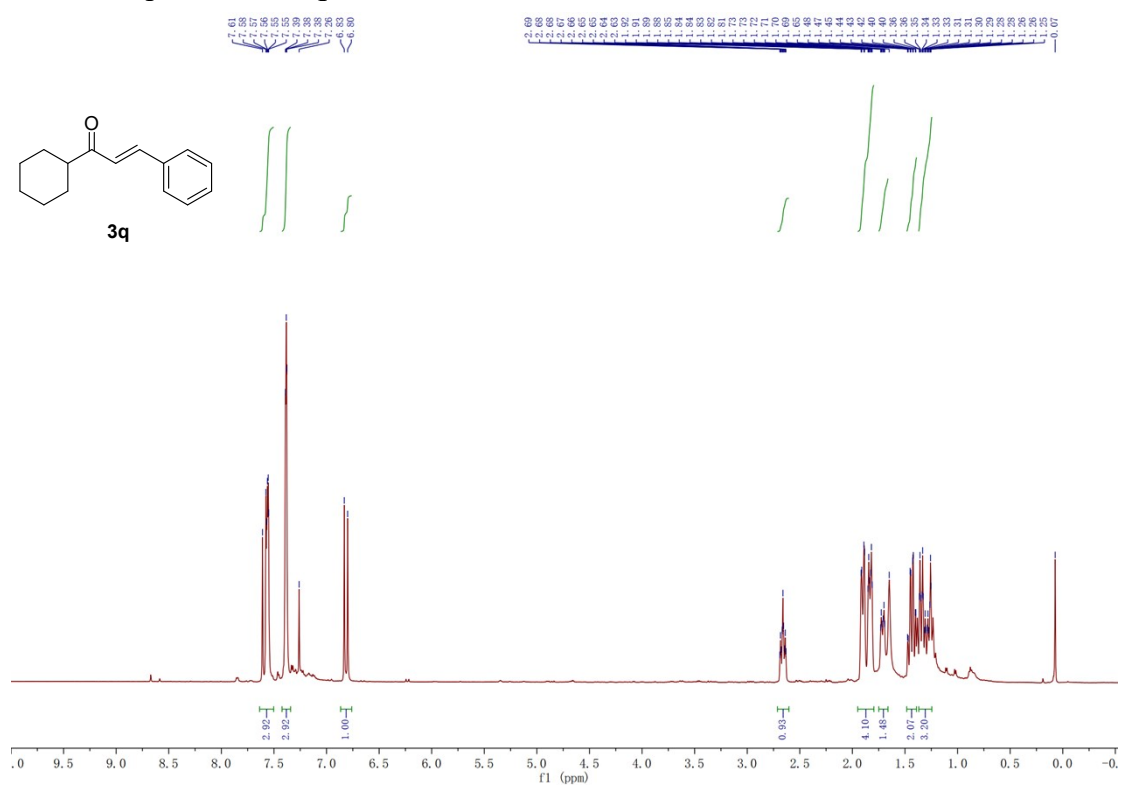

$^{13}\text{C}$  NMR spectrum of **3q** in  $\text{CDCl}_3$  at 126 MHz

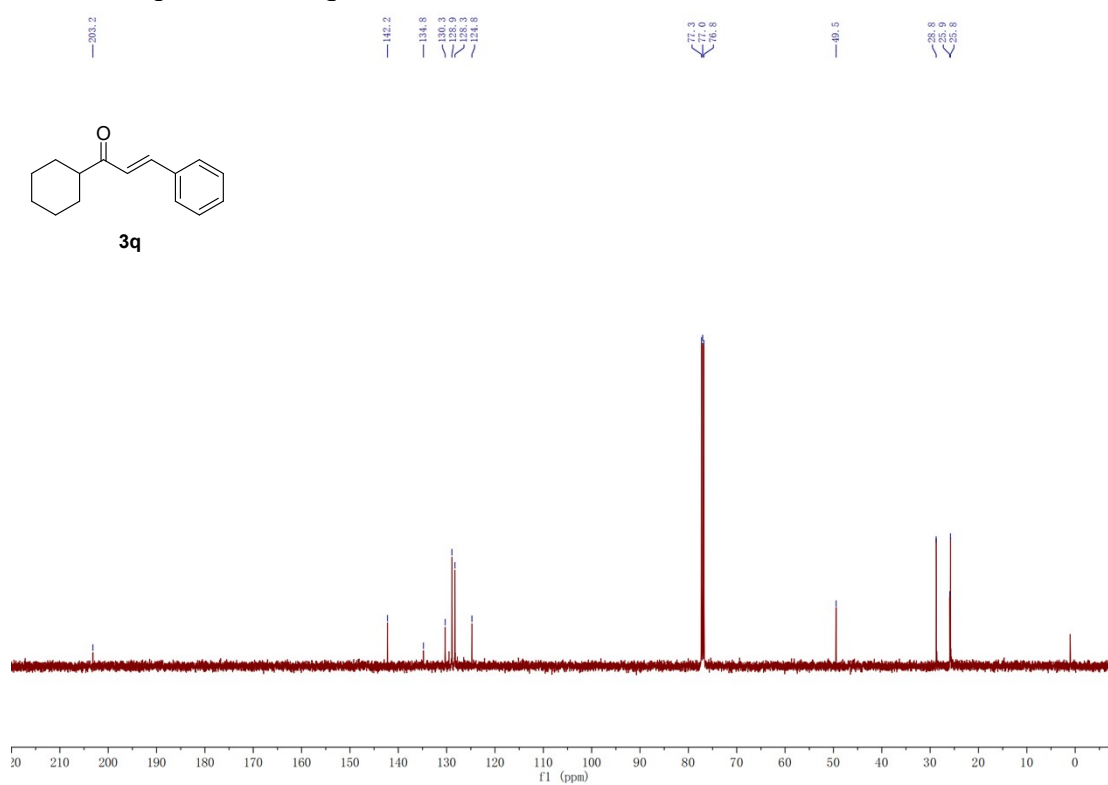

$^1\text{H}$  NMR spectrum of **3r** in  $\text{CDCl}_3$  at 500 MHz

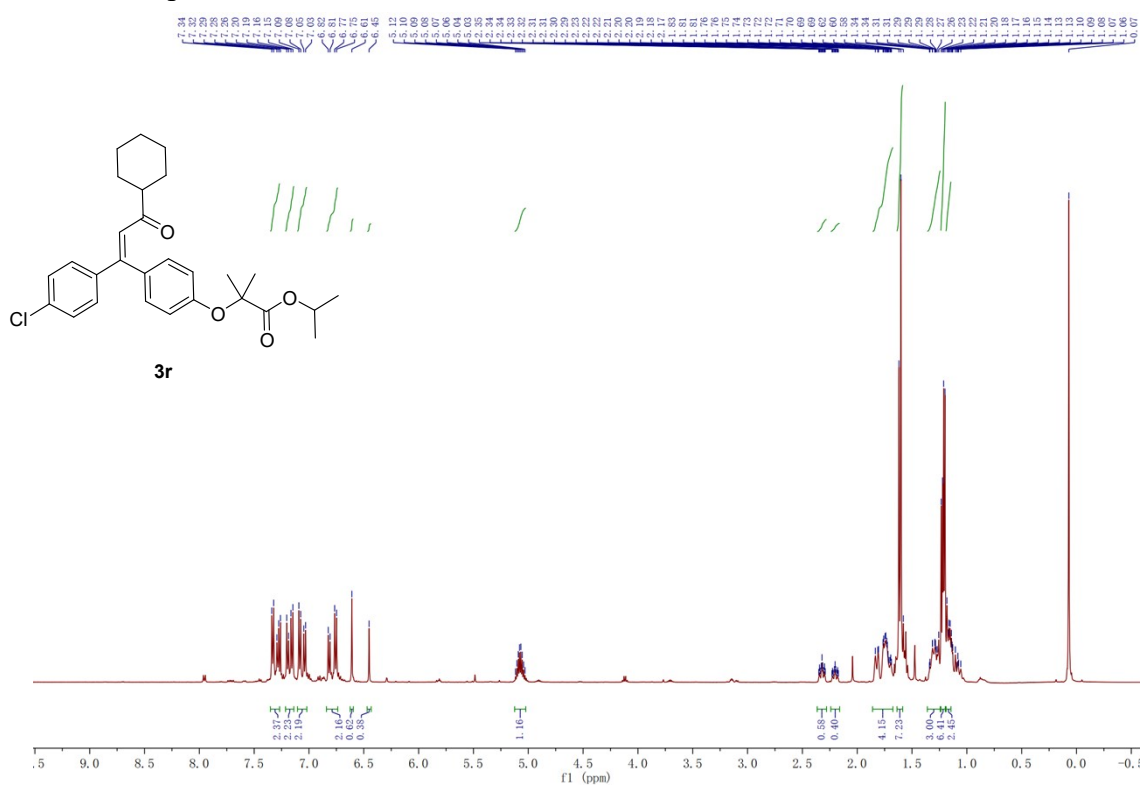

$^{13}\text{C}$  NMR spectrum of **3r** in  $\text{CDCl}_3$  at 126 MHz

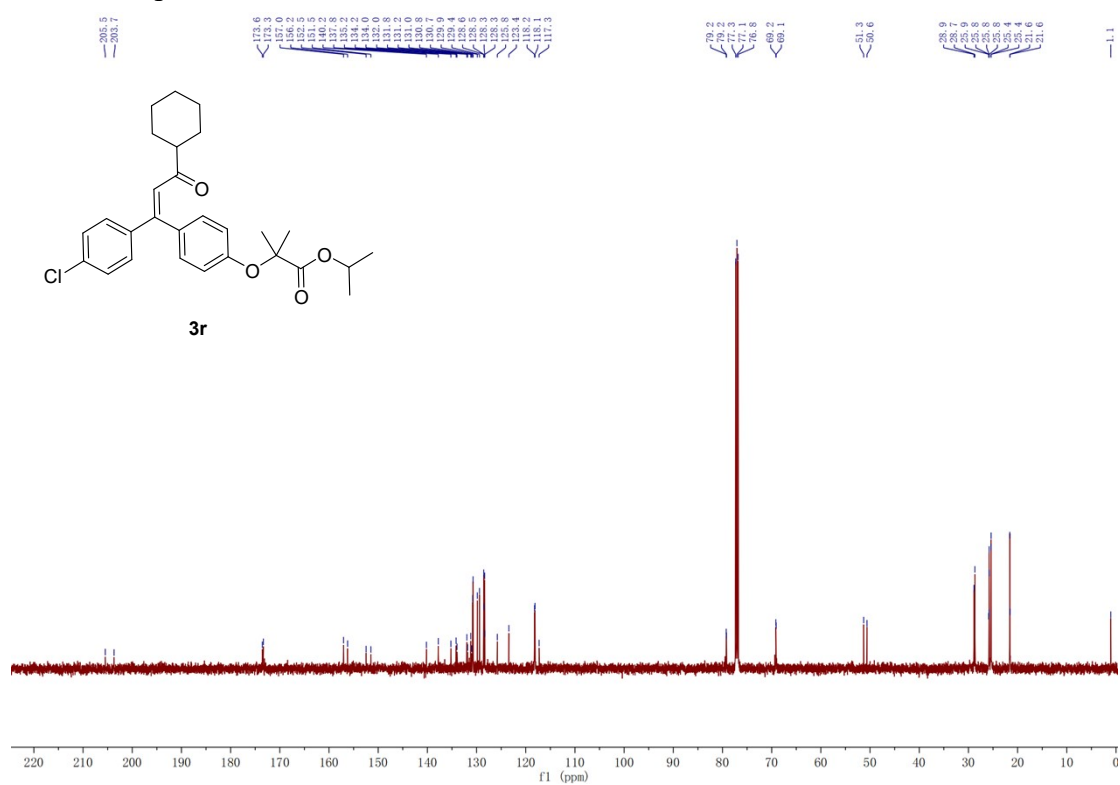

$^1\text{H}$  NMR spectrum of **3s** in  $\text{CDCl}_3$  at 500 MHz

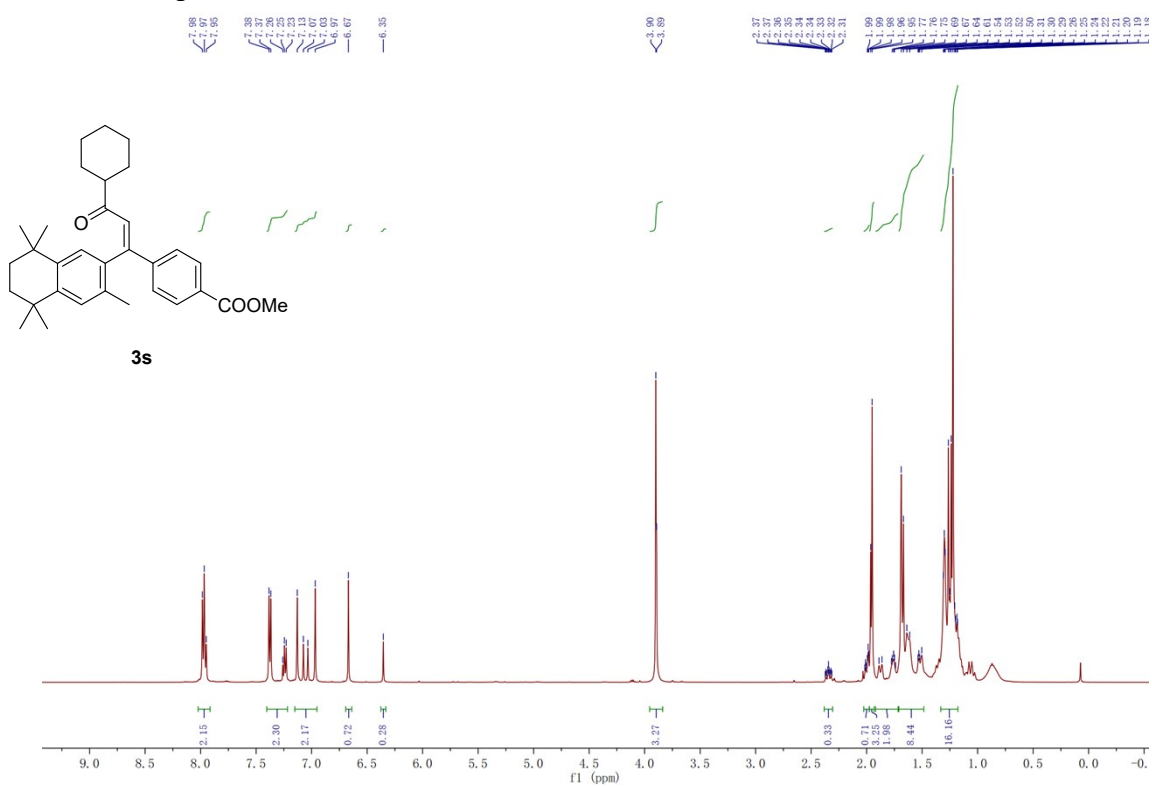

$^{13}\text{C}$  NMR spectrum of **3s** in  $\text{CDCl}_3$  at 126 MHz

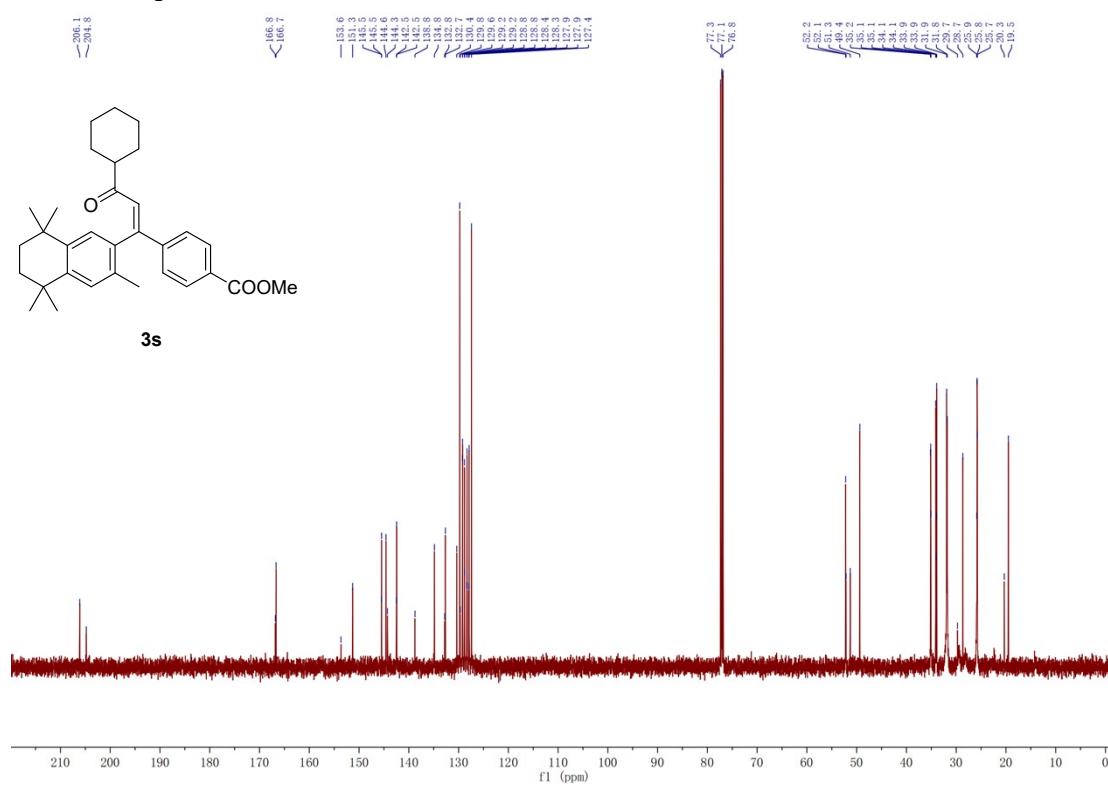

$^1\text{H}$  NMR spectrum of **4a** in  $\text{CDCl}_3$  at 500 MHz

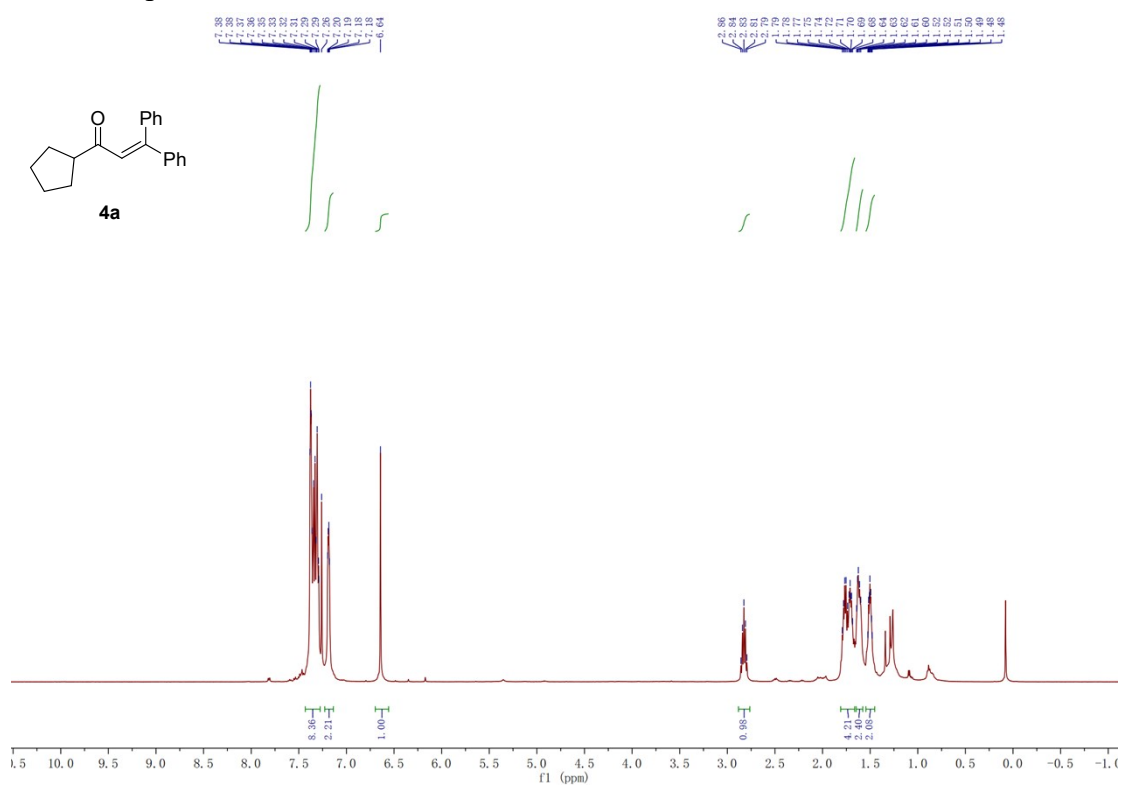

$^{13}\text{C}$  NMR spectrum of **4a** in  $\text{CDCl}_3$  at 126 MHz

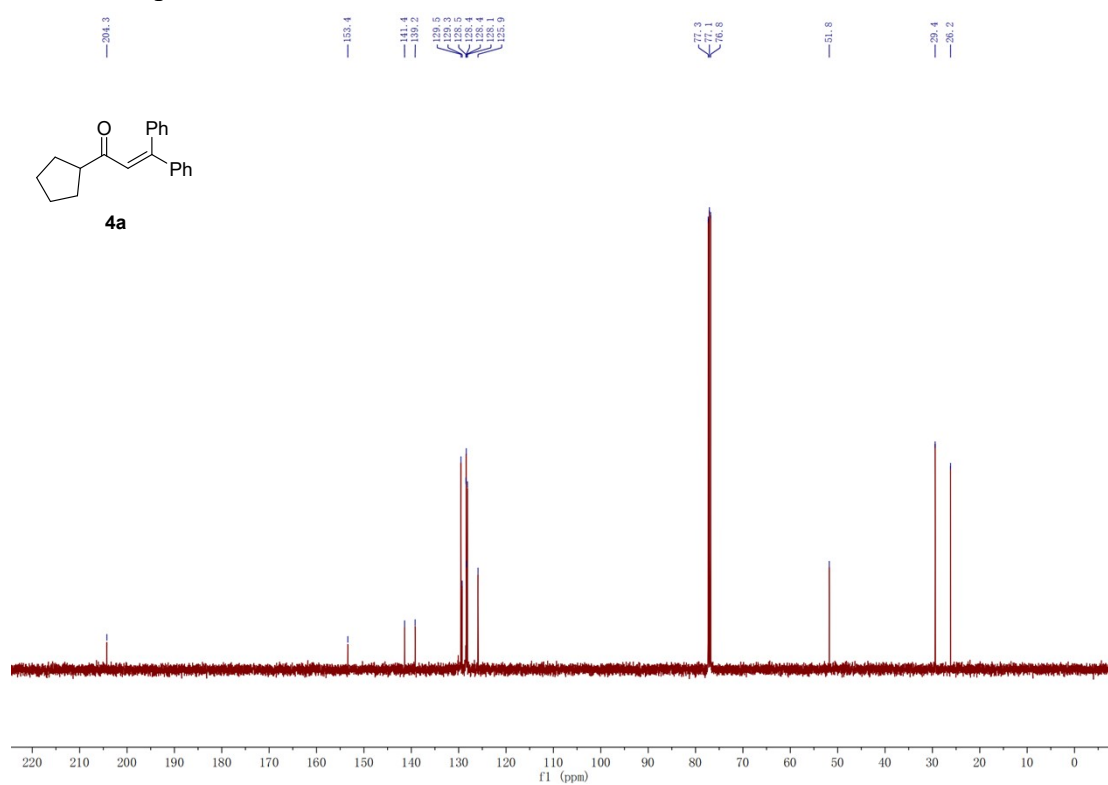

$^1\text{H}$  NMR spectrum of **4b** in  $\text{CDCl}_3$  at 500 MHz

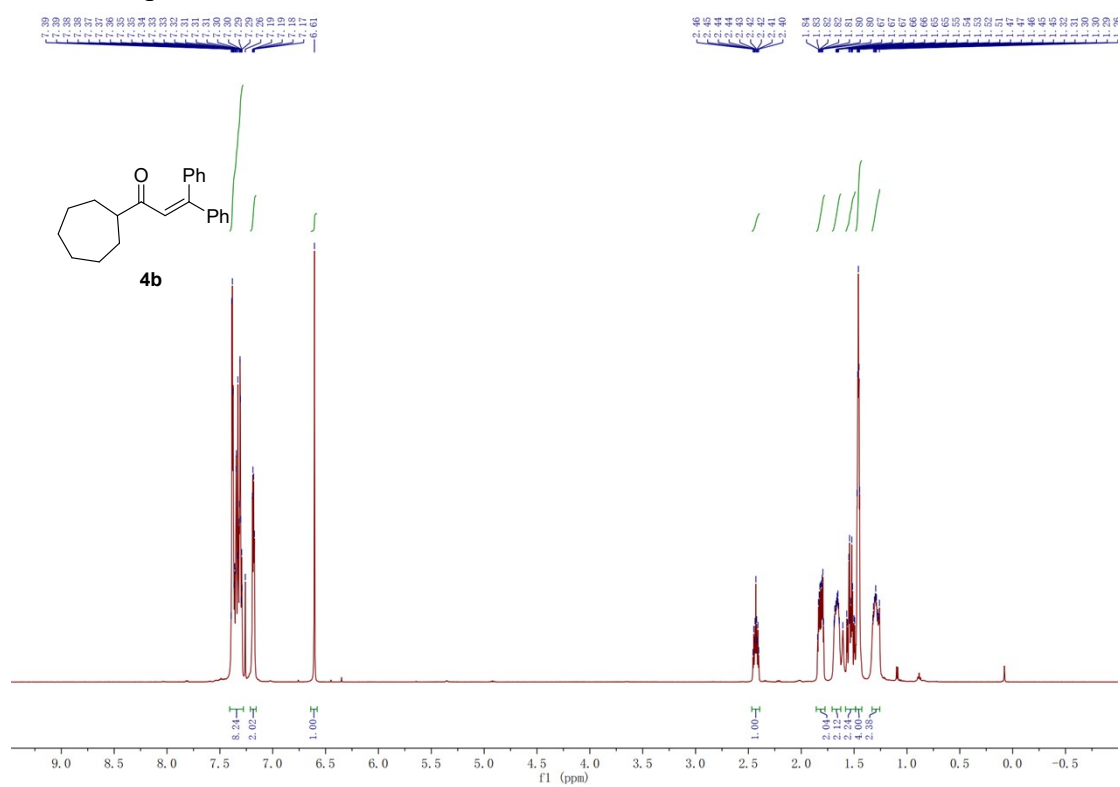

$^{13}\text{C}$  NMR spectrum of **4b** in  $\text{CDCl}_3$  at 126 MHz

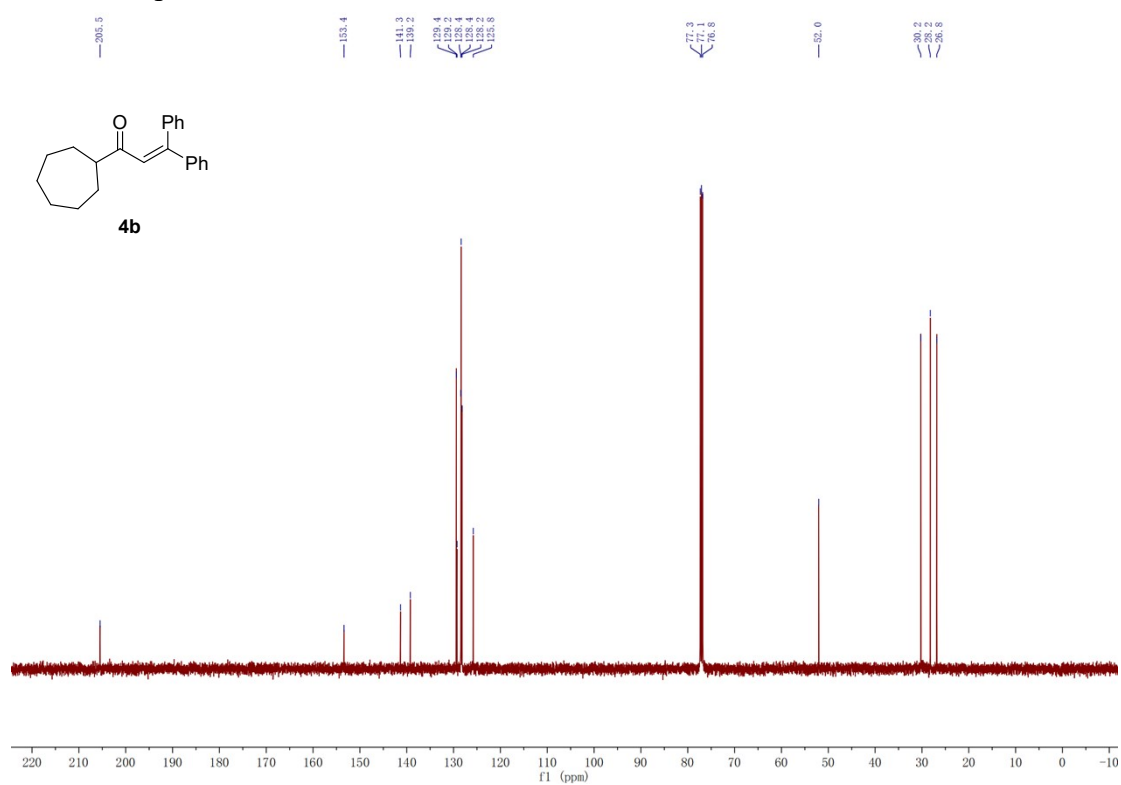

**4c**

O=C1CCCCCCC1C=Cc2ccccc2

1H NMR spectrum (CDCl<sub>3</sub>) of compound **4c**. The x-axis represents the chemical shift in ppm, ranging from -0.5 to 9.0. The spectrum shows several peaks, with integration values indicated below the baseline. The integration values are: 1.00 (aromatic region, 7.2-7.6 ppm), 1.01 (vinyl region, 6.4-6.7 ppm), and 1.00 (cyclooctanone ring region, 1.2-2.0 ppm).

**4c**

O=C1CCCCCCC1/C=C/c2ccccc2

13C NMR spectrum (ppm):

- 206.0
- 153.1
- 141.3
- 139.3
- 129.5
- 129.2
- 128.2
- 128.4
- 128.3
- 128.1
- 77.3
- 77.1
- 76.8
- 50.1
- 28.7
- 28.4
- 28.6

$^1\text{H}$  NMR spectrum of **4d** in  $\text{CDCl}_3$  at 500 MHz

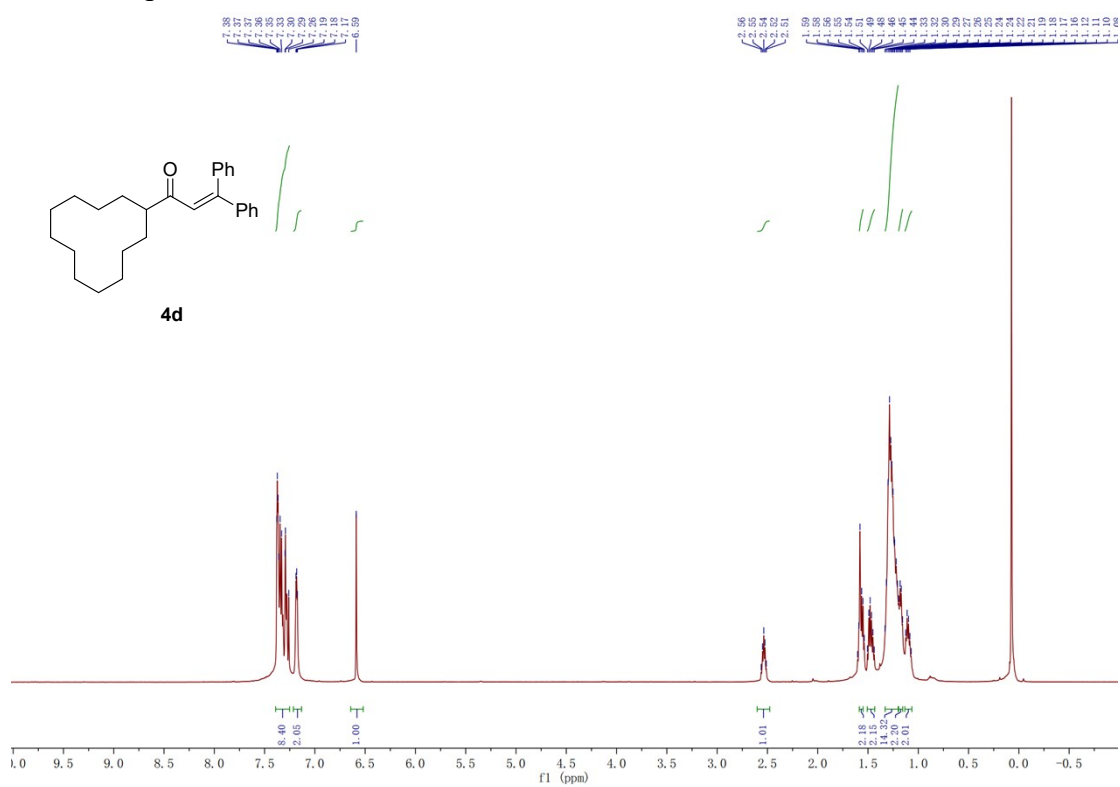

$^{13}\text{C}$  NMR spectrum of **4d** in  $\text{CDCl}_3$  at 126 MHz

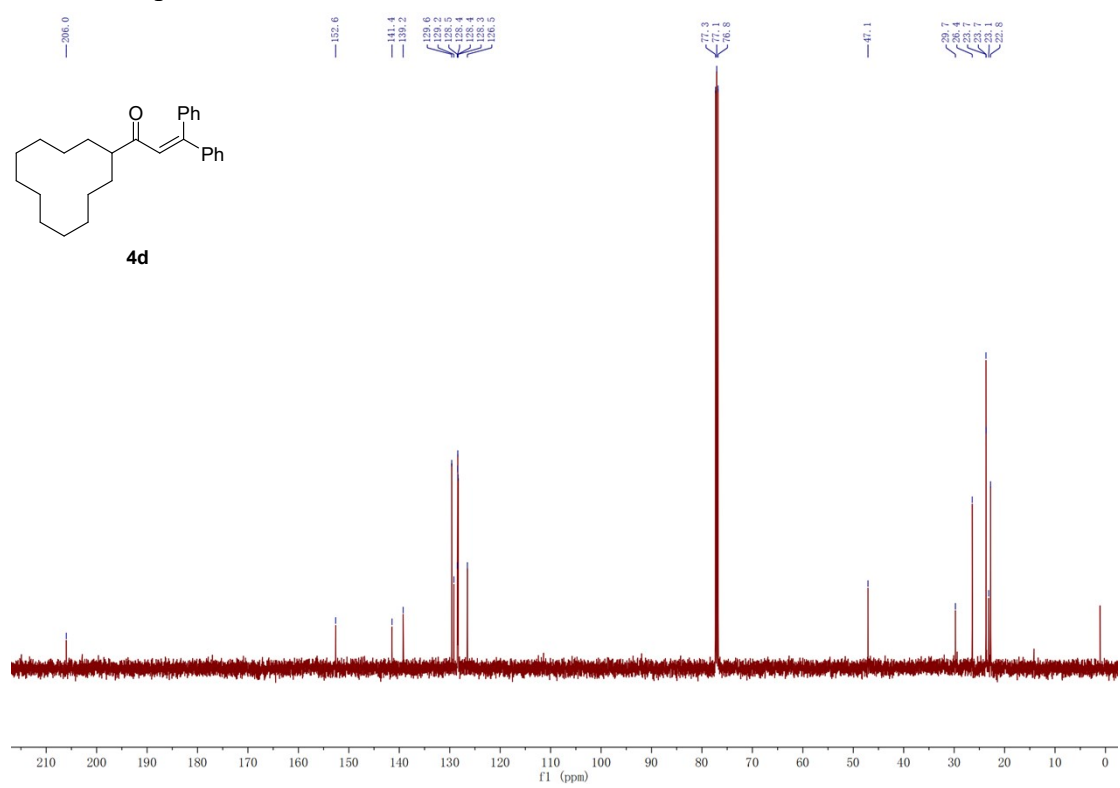



$^1\text{H}$  NMR spectrum of **4e** in  $\text{CDCl}_3$  at 500 MHz

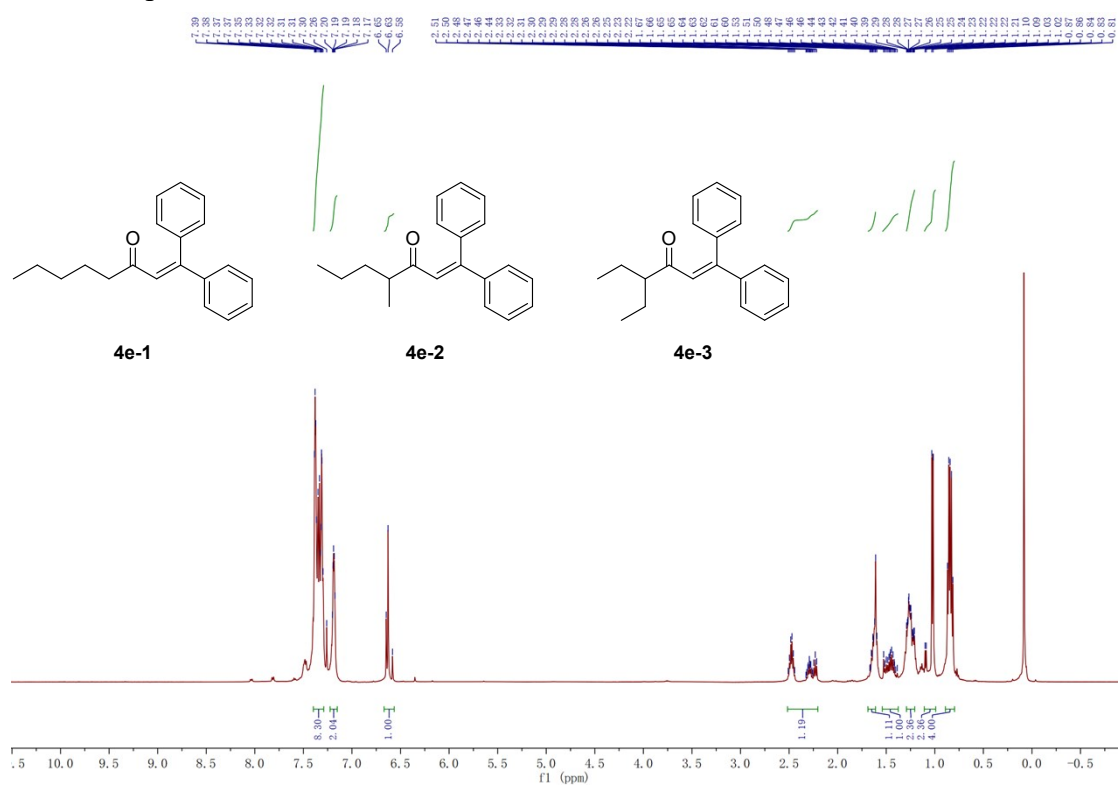

$^{13}\text{C}$  NMR spectrum of **4e** in  $\text{CDCl}_3$  at 126 MHz

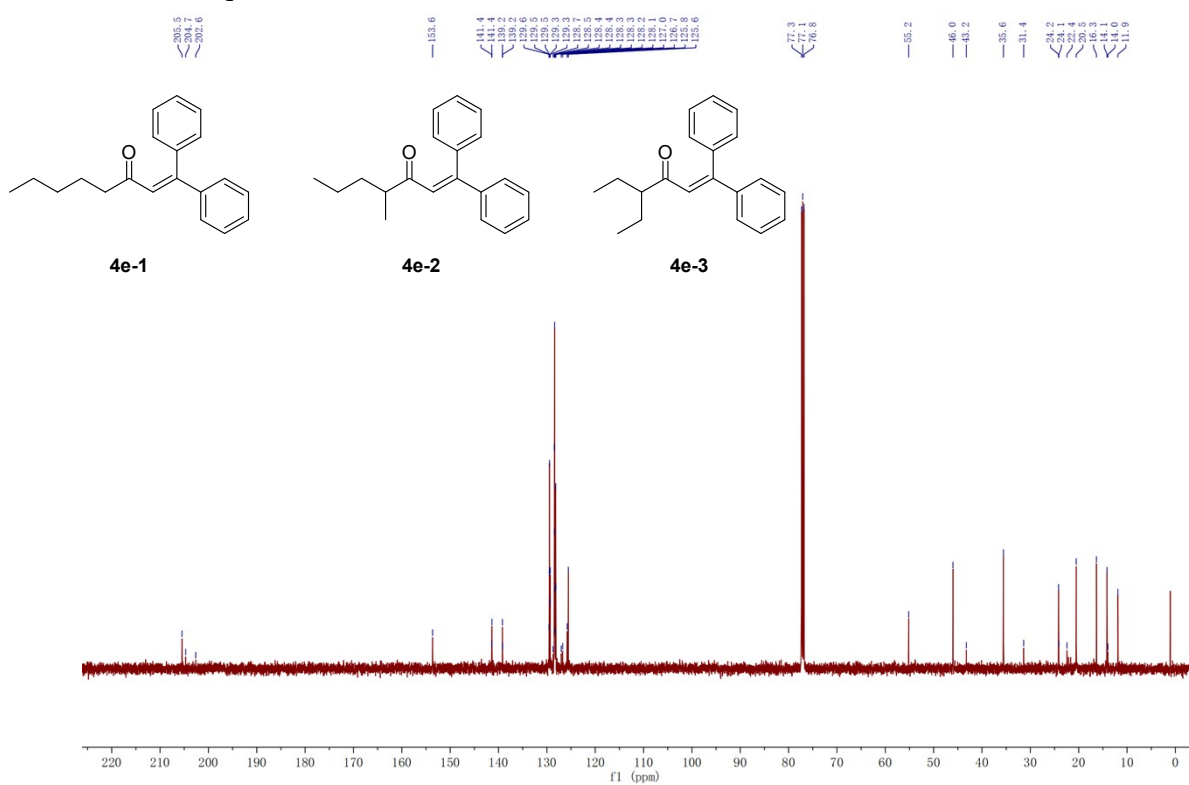

$^1\text{H}$  NMR spectrum of **4f** in  $\text{CDCl}_3$  at 500 MHz

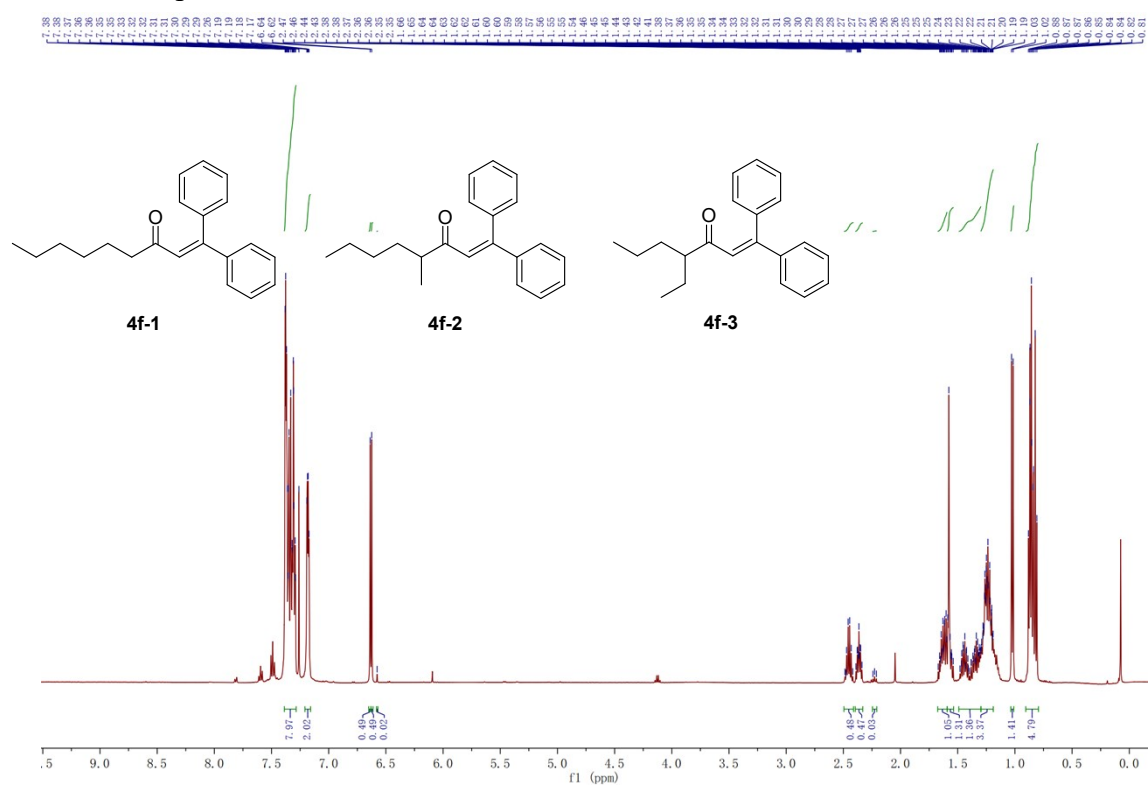

$^{13}\text{C}$  NMR spectrum of **4f** in  $\text{CDCl}_3$  at 126 MHz

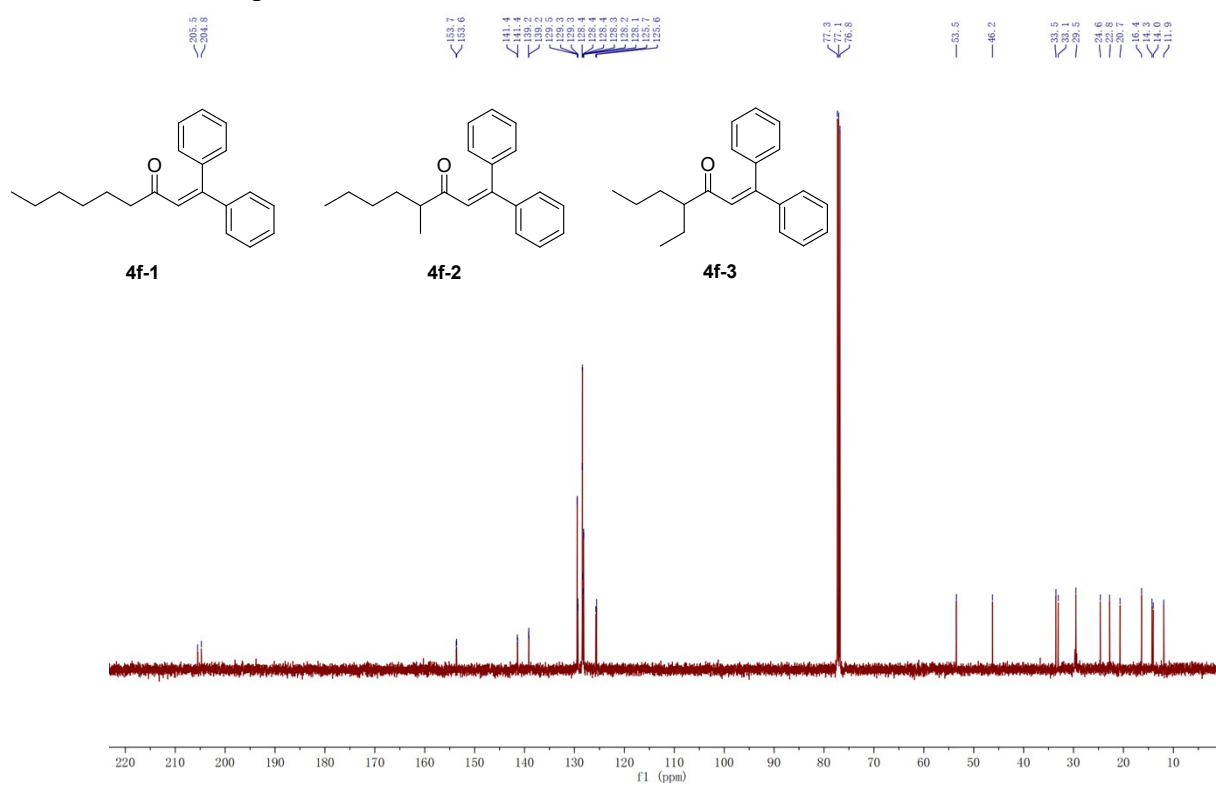

Supplement: d1cc04138j1.pdf [file d1cc04138j1.pdf]
